# Supplementary material
Source: PubMed Central journal article supplement (PMC7680365)
Supplement: NIHMS1620075-supplement-1.pdf [file NIHMS1620075-supplement-1.pdf]

## Supplemental Methods

### ***In silico* analysis of PAF1C subunits, PHF5A, and DDX3 in PC data sets**

The GEPIA web server (<http://gepia.cancer-pku.cn/>) was used to analyze TCGA PC expression data. Herein, expression data for PAF1, CTR9, LEO1, CDC73, SKI8, PHF5A, and DDX3 were obtained. The data were downloaded using the web portal and subsequently plotted<sup>1</sup>. The normalized PAAD gene expression data (FPKM-UQ) was obtained from Genomic Data Commons (GDC) web portal (<portal.gdc.cancer.gov>). Grouped boxplots of PAF1, other PAF1C subunits, DDX3, and PHF5A were made using the ggplot2 package in R. The boxplots were grouped based on the ABSOLUTE purity classifications, as provided by Raphael et al., 2017<sup>2</sup>.

### **Orthotopic tumor implantation**

SW1990, Capan1, and CD18 cell lines were engineered for inducible PAF1 knockdown using a lentiviral system; these cell lines were injected in the pancreas of 5-week-old athymic nude mice orthotopically as described previously<sup>3</sup>. Doxycycline hyclate (Sigma-Aldrich) was administered to mice assigned to the PAF1 KD group via drinking water at a concentration of 2 mg/ml in 2% sucrose solution. Control mice received 2% sucrose in drinking water.

### **Subcutaneous tumor implantation**

Control and PAF1 KD cells (40,000) were suspended in 500  $\mu$ l of PBS and mixed with Matrigel (Fisher Scientific) in a 1:1 ratio. Cells (4,000) in 100  $\mu$ l volume of PBS-matrigel mix were injected subcutaneously into the right and left flanks of 5-week-old athymic nude mice. Four mice were used per group, and the appearance of tumors was checked by palpitation two times per week. Animals were sacrificed soon after the tumor nodule reached 0.8 cm diameter.

### **Determination of tumor recurrence *in vivo***

Tumor recurrence has previously been evaluated in mouse models of PC<sup>4</sup>. Briefly,  $0.5 \times 10^6$  luciferase labelled SW1990 cells were orthotopically implanted in 6 week-old nude mice. Tumor formation was ascertained using IVIS. Two weeks post-implantation of cancer cells in the pancreas, tumors were resected as described previously<sup>4</sup>. The primary tumor in the pancreatic

tail was carefully removed by disconnecting the pancreatic body, including blood vessels, by using one clip followed by coagulation and cutting. We confirmed negative margins after the resection to ensure complete tumor removal. Six days after tumor resection, mice were imaged using IVIS to assess tumor burden, and mice were then randomized into two groups: control and PAF1 KD. Mice segregated into PAF1 KD received doxycycline (2 mg/ml) in 2% sucrose in drinking water, and the other group received 2% sucrose only (vehicle control). Tumor-bearing mice in both groups were followed for three weeks and tumor recurrence was evaluated using IVIS and histological analysis at the endpoint.

### **Limiting dilution assay**

Cell suspension of Capan1 cells was prepared for five different concentrations (C1 = 100,000 cells; C2 = 50,000 cells; C3 = 10,000 cells; C4 = 1000 cells; C5 = 100 cells) in a 50  $\mu$ l volume of PBS. Cells were mixed with 50  $\mu$ l Matrigel and were subcutaneously implanted into the right and left flanks of 5-week-old athymic nude mice. Mice were segregated into two groups: control and PAF1 KD. Three mice were used per group per cell concentration (6 tumors in each group/cell concentration), and the appearance of tumors was checked by palpitation thrice per week. Tumor dimensions were measured using Vernier Calipers for the determination of tumor volume. Tumors were harvested when control tumors became necrotic.

### **Organoid generation and culture**

In brief, tumor organoids were established after tumor resection, mechanical and enzymatic digestion of pancreatic tumor from KPC autochthonous mouse model with 0.012% (w/v) collagenase XI (Sigma) and 0.012% (w/v) dispase (GIBCO) in DMEM media containing 1% FBS (GIBCO) and embedded in growth factor reduced (GFR) Matrigel (BD)<sup>5</sup>. These organoids were maintained and cultured in complete AdDMEM/F12 medium supplemented with HEPES (Invitrogen), Glutamax (Invitrogen), penicillin/streptomycin (Invitrogen), B27 (Invitrogen), Primocin (1 mg/ml, InvivoGen), N-acetyl-L-cysteine (1 mM, Sigma), mouse recombinant Wnt3a (100 ng/ml, Milipore), human recombinant RSpondin1 (1  $\mu$ g/ml, Nuvelo), Noggin (0.1 mg/ml,

Peprtech), epidermal growth factor (EGF, 50 ng/ml, Peprtech), Gastrin (10 nM, Sigma), fibroblast growth factor 10 (FGF10, 100 ng/ml, Preprotech), Nicotinamide (10 mM, Sigma), and A83-01 (0.5 mM, Tocris). Human organoids were derived from the pancreas tissue obtained from fresh tissue bank at UNMC and cultured using the same protocol as followed with mouse organoids with the addition of Wnt3A (1X (50% V/V), Preprotech).

### **ALDEFLUOR Assay**

The cells expressing high levels of activity of the enzyme aldehyde dehydrogenase (ALDH) were stained using ALDEFLUOR reagent (Stem Cell Technologies, Cambridge, MA, USA. Cat: 01700) using the manufacturer's instructions. A specific inhibitor of ALDH, diethylaminobenzaldehyde (DEAB), was used to control for background fluorescence.

### **Analysis of CD44<sup>+</sup> CSCs using flow cytometry**

Cells were trypsinized, counted, and resuspended to get one million cells/100  $\mu$ l per tube. Cells were incubated with human CD44-APC antibody (Miltenyi Biotec Inc. Auburn, CA, USA .Cat:130-098-110) for 15 minutes at 4 °C, followed by two PBS washes and resuspension in 500  $\mu$ l media. Appropriate single and double color controls were included, and cells with a high expression of CD44<sup>+</sup> (high CD44<sup>+</sup>) were gated using appropriate controls.

### **Apoptosis Assay**

SW1990 SP and 9-26 NP cells were treated with vehicle control DMSO or RK-33 (5M) for 48 h. Cell supernatant and adherent cells were collected, stained with annexin V and propidium iodide (PI), and analyzed by flow cytometry as described previously<sup>6</sup>.

### **Immunoblot Assay**

Cells were processed for protein isolation and Western Blotting using standard procedures, as described previously<sup>7</sup>. The following primary antibodies were used: anti-PAF1, anti-LEO1, anti-CDC73, anti-CTR9 (Bethyl Laboratories, Montgomery, TX, USA); anti-PHF5A (Proteintech, Rosemont, Illinois, USA); anti-OCT3/4, anti-SOX-2, anti-CD24, anti-ESA (Santa Cruz Biotechnology, Dallas, TX, USA); anti-CD44 (Cell signalling Technology, Danvers, MA, USA);

anti-CD133 (Abnova, Walnut, CA, USA); anti- $\beta$ -Catenin (Sigma); anti-DDX3, anti-Lgr5, and anti-SOX-9 (Abcam, Cambridge, MA, USA). All antibodies were incubated overnight at 4 °C.  $\beta$ -ACTIN was used as a loading control.

### **Immunofluorescence analysis**

Cells were plated, fixed, and processed as described previously<sup>7</sup>. Primary antibodies specific for mouse-PAF1 (1:100 in PBS), mouse-OCT3/4 (1:100), rabbit- $\beta$ -CATENIN (1:100), mouse-CD44 (1:250), and rabbit-ESA (1:1500) were used with a 4 h incubation for cells. For human and mouse tissues, we followed the same procedure mentioned previously<sup>8</sup>, but incubation with primary antibodies was performed overnight at 4 °C. Following primary antibody incubation, the cells and tissue sections were processed using standard procedures, as described previously<sup>7</sup>. Confocal images were collected using Zeiss LSM800 confocal microscope with a 63x/1.4 NA oil objective.

Quantification of fluorescent intensity: Multichannel snapshots were split into separate channels in ImageJ. A region of interest was drawn around individual cells in one of the two channels using the “freehand” tool. This region was then subjected to the measure plugin, and intensity was calculated by multiplying area and mean intensity. The measurement of intensity was made for 10 cells in a field and 5-6 images per condition. The intensity values were represented relative to the control condition in arbitrary units (A.U.).

### **Colony formation assay (clonogenic assay)**

SW1990 SP PD2/PAF1 CRISPR KD cells and control SW1990 SP cells were trypsinized and seeded at a density of 1000 cells/well in a 6-well plate in triplicates. The cells were cultured in CSC-specific media, with media changed once in two days. After two weeks of growth, the cells were fixed with 100% methanol and stained with crystal violet stain (0.1%, w/v in 20 mM 4-morpholinepropanesulfonic acid; Sigma) before the colonies started to merge. Total colony area was quantified using ImageJ.

### **Tumor sphere assay**

Capan1 SP cells that were engineered to knockdown PAF1 using Dox-induced shRNA were seeded in triplicates in a 96-well non-adherent plate (Corning Inc., Corning, New York, USA) in CSC-specific media at a concentration of 100 cells/well in two sets. The cells in suspension culture were observed under the microscope and fresh media was added every alternate day without removing the existing media in the set designated as control, whereas the set designated as KD set received Dox at 2 µg/ml every alternate day. Treatment with RK-33 was initiated 24 h after cell seeding. A week later, multiple images were taken per well for different fields of view. The diameter of each tumor sphere was measured using Motic Images Plus 2.0 ML software; the plot depicting the diameter of tumor sphere in PAF1 KD cells and control cells was plotted using MedCalc software.

#### **Cell motility assay**

The motility assay was performed by using a chamber containing a monolayer-coated polyethylene terephthalate membrane (six-well insert, a pore size of 8 µm; Becton Dickinson, Franklin Lakes, NJ, USA). Both control and PAF1 knockdown (Dox treated) SW1990 cells ( $1 \times 10^6$  cells per well) were seeded in six-well plates. After a 24 h incubation period, the migrated cells that had reached the lower chamber were stained with a Diff-Quick stain set and counted in different fields. The average number of migrated cells per representative field was calculated.

#### **Wound-healing assay**

The wound-healing assay was performed as described previously<sup>9</sup>. Briefly,  $4 \times 10^6$  control and PAF1 KD (2 mg/ml doxycycline treated) cells were seeded in 6-well plates. After 24 h, a scratch was made on the bottom of each well using a P200 pipette tip. Photographs of the scratch were taken at 0 h and 24 h. The pictures were then analyzed to quantify the change in size of the scratches as the cells migrated into the space; wound closure was compared between control and PAF1 depleted cells.

#### **Immunoprecipitation analysis**

SW1990 SP, HPDE, and F9 cells were cultured in their respective culture conditions, and the lysates were collected in a CHAPS non-denaturing immunoprecipitation buffer (20 mM Tris, pH 7.5, 200 mM NaCl, 1%). Immunoprecipitation was performed with PAF1 (ChIP-grade, Abcam) and anti-Phf5a (Proteintech) antibodies using Dynabeads protein G (Invitrogen). Following pre-clearing, 500 µg of lysates prepared at 1 mg/ml were incubated with 3 µg of respective antibodies overnight in a rotor at 4 °C. The next day, dyna beads (20 µl per reaction) were added to the antibody-lysate mix and incubated for rotation at 4 °C for 6 h. Thereafter, the unbound antibodies were washed with IP wash buffer (40 mM HEPES pH 7.4, 500 mM NaCl, 2.5 mM MgCl<sub>2</sub>, 2 mM EGTA, and 1% Triton X-100), and the immunoprecipitated proteins were eluted using a high pH ammonium buffer and were concentrated using a speed Vac. The immunoprecipitates, or total cell lysates, were transferred onto the PVDF membrane after being resolved on 10% SDS PAGE, and thereafter were incubated overnight at 4 °C with primary antibodies (anti-PAF1, anti-OCT3/4, anti-LEO1, anti-CTR9, and anti-CDC73).

#### **RNA isolation and quantitative reverse-transcription Polymerase Chain Reaction (qRT-PCR)**

Total cellular RNA was extracted from cells using the RNeasy kit (Qiagen, Hilden, Germany) and processed for reverse transcription to generate cDNA as described previously<sup>10</sup>. cDNA products were assayed by quantitative real-time PCR using SYBR Green incorporation. The expression of all genes was normalized to that of internal control β-actin and expressed relative to the indicated reference sample (average ± SEM of triplicate reactions).

#### **Human transcription factors PCR array**

Total RNA isolated from SW1990 SP and PAF1-depleted SP cells were reverse-transcribed using RT<sup>2</sup> SYBR qPCR master mix (330,401, Qiagen). Aliquots of 25 µl of the mix of both samples were added in separate 96-well PCR array kits containing lyophilized gene-specific

primer set (PAHS-075Z, Qiagen). Threshold cycles were used to calculate fold change using the online web server of RT<sup>2</sup> profiler PCR array data analysis<sup>11</sup>.

### **Chromatin Immunoprecipitation (ChIP)-Sequencing**

SW1990 SP cells were fixed with 0.4% formaldehyde and 1.5 mM EGS (ethylene glycol bis(succinimidyl succinate)) (Thermo Scientific Fischer), washed, harvested, and resuspended in 500 µl SDS lysis buffer (1% SDS, 10 mM EDTA, 50 mM Tris-HCl [pH 8.1], 1 mM PMSF, and 1 µg/ml aprotinin). Samples were sonicated and diluted in ChIP dilution buffer (0.01% SDS, 1.1% Triton X-100, 1.2 mM EDTA, 16.7 mM Tris-HCl [pH 8.1], 167 mM NaCl, 1 mM PMSF, and 1 µg/ml aprotinin). For input control, 10% of sonicated samples were separated. Immunoprecipitation was performed with ChIP-grade PAF1 (Abcam) and Phf5a (Proteintech) antibody as previously described. Chromatin extracts were pulled down with protein A+G beads. The samples were washed extensively with wash buffers (low salt, high salt, LiCl, and Tris/EDTA buffers), eluted with SDS elution buffer, and subjected to reverse cross-linking and proteinase digestion. IgG antibody was used as a control for the ChIP assay.

ChIP-seq Analysis: The captured and purified DNA was prepared for high throughput sequencing using the New England Biolabs NEBNext Ultra II DNA Library Prep Kit for Illumina. The resulting indexed libraries were sequenced by the UNMC Sequencing Core Facility using an Illumina NextSeq 500 Genome Analyzer. Initial raw sequence files were processed based on the following steps. Adaptor sequences and low quality (Phred score < 20) ends were trimmed from sequences using Trim Galore software package ([http://www.bioinformatics.babraham.ac.uk/projects/trim\\_galore/](http://www.bioinformatics.babraham.ac.uk/projects/trim_galore/)). Resulting fastq files were aligned to the human genome (GRCh38/hg38) using the sequence aligner Bowtie2 (version 2.2.3)<sup>12</sup>. The software package Picard routine, MarkDuplicates, (<http://broadinstitute.github.io/picard/>) was used to remove sequence duplications. For peak calling of ChIP enriched regions, the MACS2 peak caller software (version 2.1.1)<sup>13</sup> of each ChIP

to corresponding input DNA sample was used to determine binding regions based on a FDR adjusted p-value (q-value) <0.05. BigWig files were generated using the deeptools bamCoverage routine (<https://deeptools.readthedocs.io/en/develop/>). Alignment of significant peaks to gene-specific regions was accomplished using the bedtools routine intersect (<https://bedtools.readthedocs.io/en/latest/>). Raw files were submitted to GEO (accession number GSE144371).

### **RNA-Sequencing**

SW1990 SP control and PAF1 CRISPR KD cells were lysed in RNA lysis buffer supplied with the mirVana RNA isolation kit (Thermo Scientific Fischer, n = 2). Total RNA was isolated in accordance with the manufacturer's protocol. Whole transcriptome analysis (RNA sequencing) was performed on PAF1 KD and control cells at the Sequencing Core Facility at the University of Nebraska Medical Center. RNA quality was checked with an Agilent Bioanalyzer (Agilent Technologies, Inc.) and all RINs (RNA integrity numbers) were 10. Library preparation was achieved using Illumina TruSeq RNA Sample Preparation Kit according to the manufacturer's protocol. Fifteen cycles of PCR amplification were performed for each library, followed by examination of size distribution using an Agilent Bioanalyzer (Agilent Technologies, Inc.) and a DNA 1000 chip. Each sample used one out of twelve unique indices (Illumina). All libraries displayed a band between 200–500 bp with a peak at approximately 290 bp. The Qubit 2.0 Fluorometer (Life Technologies, Inc.) was used to quantitate the libraries. Loading was performed at a concentration of 6 pM. Sequencing was done on HiSeq 2500 sequencer in rapid mode. It was a single read, 50 cycle, sequencing run, and onboard clustering and V2 chemistry was used. Raw files for RNA-seq were submitted to GEO (accession number GSE144371).

### **Mass Spectrometry**

Sample prep summary: Protein fractions were excised from SDS-PAGE gel, destained, reduced with tris-carboxyethylphosphine, alkylated with iodoacetamide, and digested overnight with



sequencing-grade trypsin (Promega). Tryptic peptides were eluted from the gel and concentrated to 20  $\mu$ l by vacuum centrifugation and analyzed using a high-resolution mass spectrometry nano-LC-MS/MS Tribrid system, Orbitrap Fusion™ Lumos™ coupled with UltiMate 3000 HPLC system (Thermo Scientific). 500 ng of peptides were run by the pre-column (Acclaim PepMap™ 100, 75 $\mu$ m  $\times$  2cm, nanoViper, Thermo Scientific) and the analytical column (Acclaim PepMap™ RSCL, 75  $\mu$ m  $\times$  50 cm, nanoViper, Thermo Scientific). The samples were eluted using a 120-min linear gradient of ACN (5-45%) in 0.1% FA.

Results summary: All MS/MS samples were analyzed using Mascot (Matrix Sciences, London, UK, version 2.6.). Mascot was set up to search the SwissProt database (selected for Homo sapiens, 2018\_06, 20361 entries), assuming the digestion enzyme trypsin. Parameters on MASCOT were set as follows: Enzyme: trypsin, Max missed cleavage: 1, Peptide charge: 1+, 2+, and 3+, Peptide tolerance:  $\pm$  0.8 Da, Fixed modifications: carbamidomethyl (C), Variable modifications: oxidation (M), MS/MS tolerance:  $\pm$  0.6 Da with error tolerant search, Instrument: ESI-TRAP. MASCOT results for different gel cuts of the same sample were combined and analyzed using Scaffold, which allows multiple search results to be condensed into a single result file.

Scaffold (version 4.8.7, Proteome Software Inc., Portland, OR) was used to validate MS/MS-based peptide and protein identifications. Peptide identifications were accepted if they could be established at greater than 95.0% probability by the Peptide Prophet algorithm<sup>14</sup> with Scaffold delta-mass correction. Protein identifications were accepted if they could be established at greater than 99.0% probability and contained at least 2 identified peptides. Protein probabilities were assigned by the Protein Prophet algorithm<sup>15</sup>. Proteins that contained similar peptides and could not be differentiated based on MS/MS analysis alone were grouped to satisfy the principles of parsimony. Proteins sharing significant peptide evidence were grouped into clusters.

### **Statistical analysis**

Student's *t*-test was used to determine the statistical significance between control and PAF1 knockdown group in all the experiments pertaining to this study. Statistical analysis and the generation of graphs were performed using GraphPad Prism and MedCalc software. Alfa level of 0.05 was used for statistical significance unless otherwise indicated. Error bars were given on the basis of calculated standard error values.

### Supplementary references

1. Tang Z, Li C, Kang B, et al. GEPIA: a web server for cancer and normal gene expression profiling and interactive analyses. *Nucleic Acids Res* 2017;45:W98-W102.
2. Cancer Genome Atlas Research Network. Electronic address aadhe, Cancer Genome Atlas Research N. Integrated Genomic Characterization of Pancreatic Ductal Adenocarcinoma. *Cancer Cell* 2017;32:185-203 e13.
3. Vaz AP, Deb S, Rachagani S, et al. Overexpression of PD2 leads to increased tumorigenicity and metastasis in pancreatic ductal adenocarcinoma. *Oncotarget* 2015.
4. Gürlevik E, Fleischmann-Mundt B, Brooks J, et al. Administration of Gemcitabine After Pancreatic Tumor Resection in Mice Induces an Antitumor Immune Response Mediated by Natural Killer Cells. *Gastroenterology* 2016;151:338-350.e7.
5. Boj SF, Hwang CI, Baker LA, et al. Organoid models of human and mouse ductal pancreatic cancer. *Cell* 2015;160:324-38.
6. Lakshmanan I, Batra SK. Protocol for Apoptosis Assay by Flow Cytometry Using Annexin V Staining Method. *Bio Protoc* 2013;3.
7. Vaz AP, Ponnusamy MP, Rachagani S, et al. Novel role of pancreatic differentiation 2 in facilitating self-renewal and drug resistance of pancreatic cancer stem cells. *Br. J Cancer* 2014;111:486-496.
8. Nimmakayala RK, Seshacharyulu P, Lakshmanan I, et al. Cigarette Smoke Induces Stem Cell Features of Pancreatic Cancer Cells via PAF1. *Gastroenterology* 2018;155:892-908 e6.
9. Lakshmanan I, Rachagani S, Hauke R, et al. MUC5AC interactions with integrin beta4 enhances the migration of lung cancer cells through FAK signaling. *Oncogene* 2016;35:4112-21.
10. Ponnusamy MP, Deb S, Dey P, et al. RNA polymerase II associated factor 1/PD2 maintains self-renewal by its interaction with Oct3/4 in mouse embryonic stem cells. *Stem Cells* 2009;27:3001-3011.
11. Kumar S, Das S, Rachagani S, et al. NCOA3-mediated upregulation of mucin expression via transcriptional and post-translational changes during the development of pancreatic cancer. *Oncogene* 2015;34:4879-89.
12. Langmead B, Salzberg SL. Fast gapped-read alignment with Bowtie 2. *Nat Methods* 2012;9:357-9.
13. Zhang Y, Liu T, Meyer CA, et al. Model-based analysis of ChIP-Seq (MACS). *Genome Biol* 2008;9:R137.
14. Keller A, Nesvizhskii AI, Kolker E, et al. Empirical statistical model to estimate the accuracy of peptide identifications made by MS/MS and database search. *Anal Chem* 2002;74:5383-92.
15. Nesvizhskii AI, Keller A, Kolker E, et al. A statistical model for identifying proteins by tandem mass spectrometry. *Anal Chem* 2003;75:4646-58.

**Figure S1**

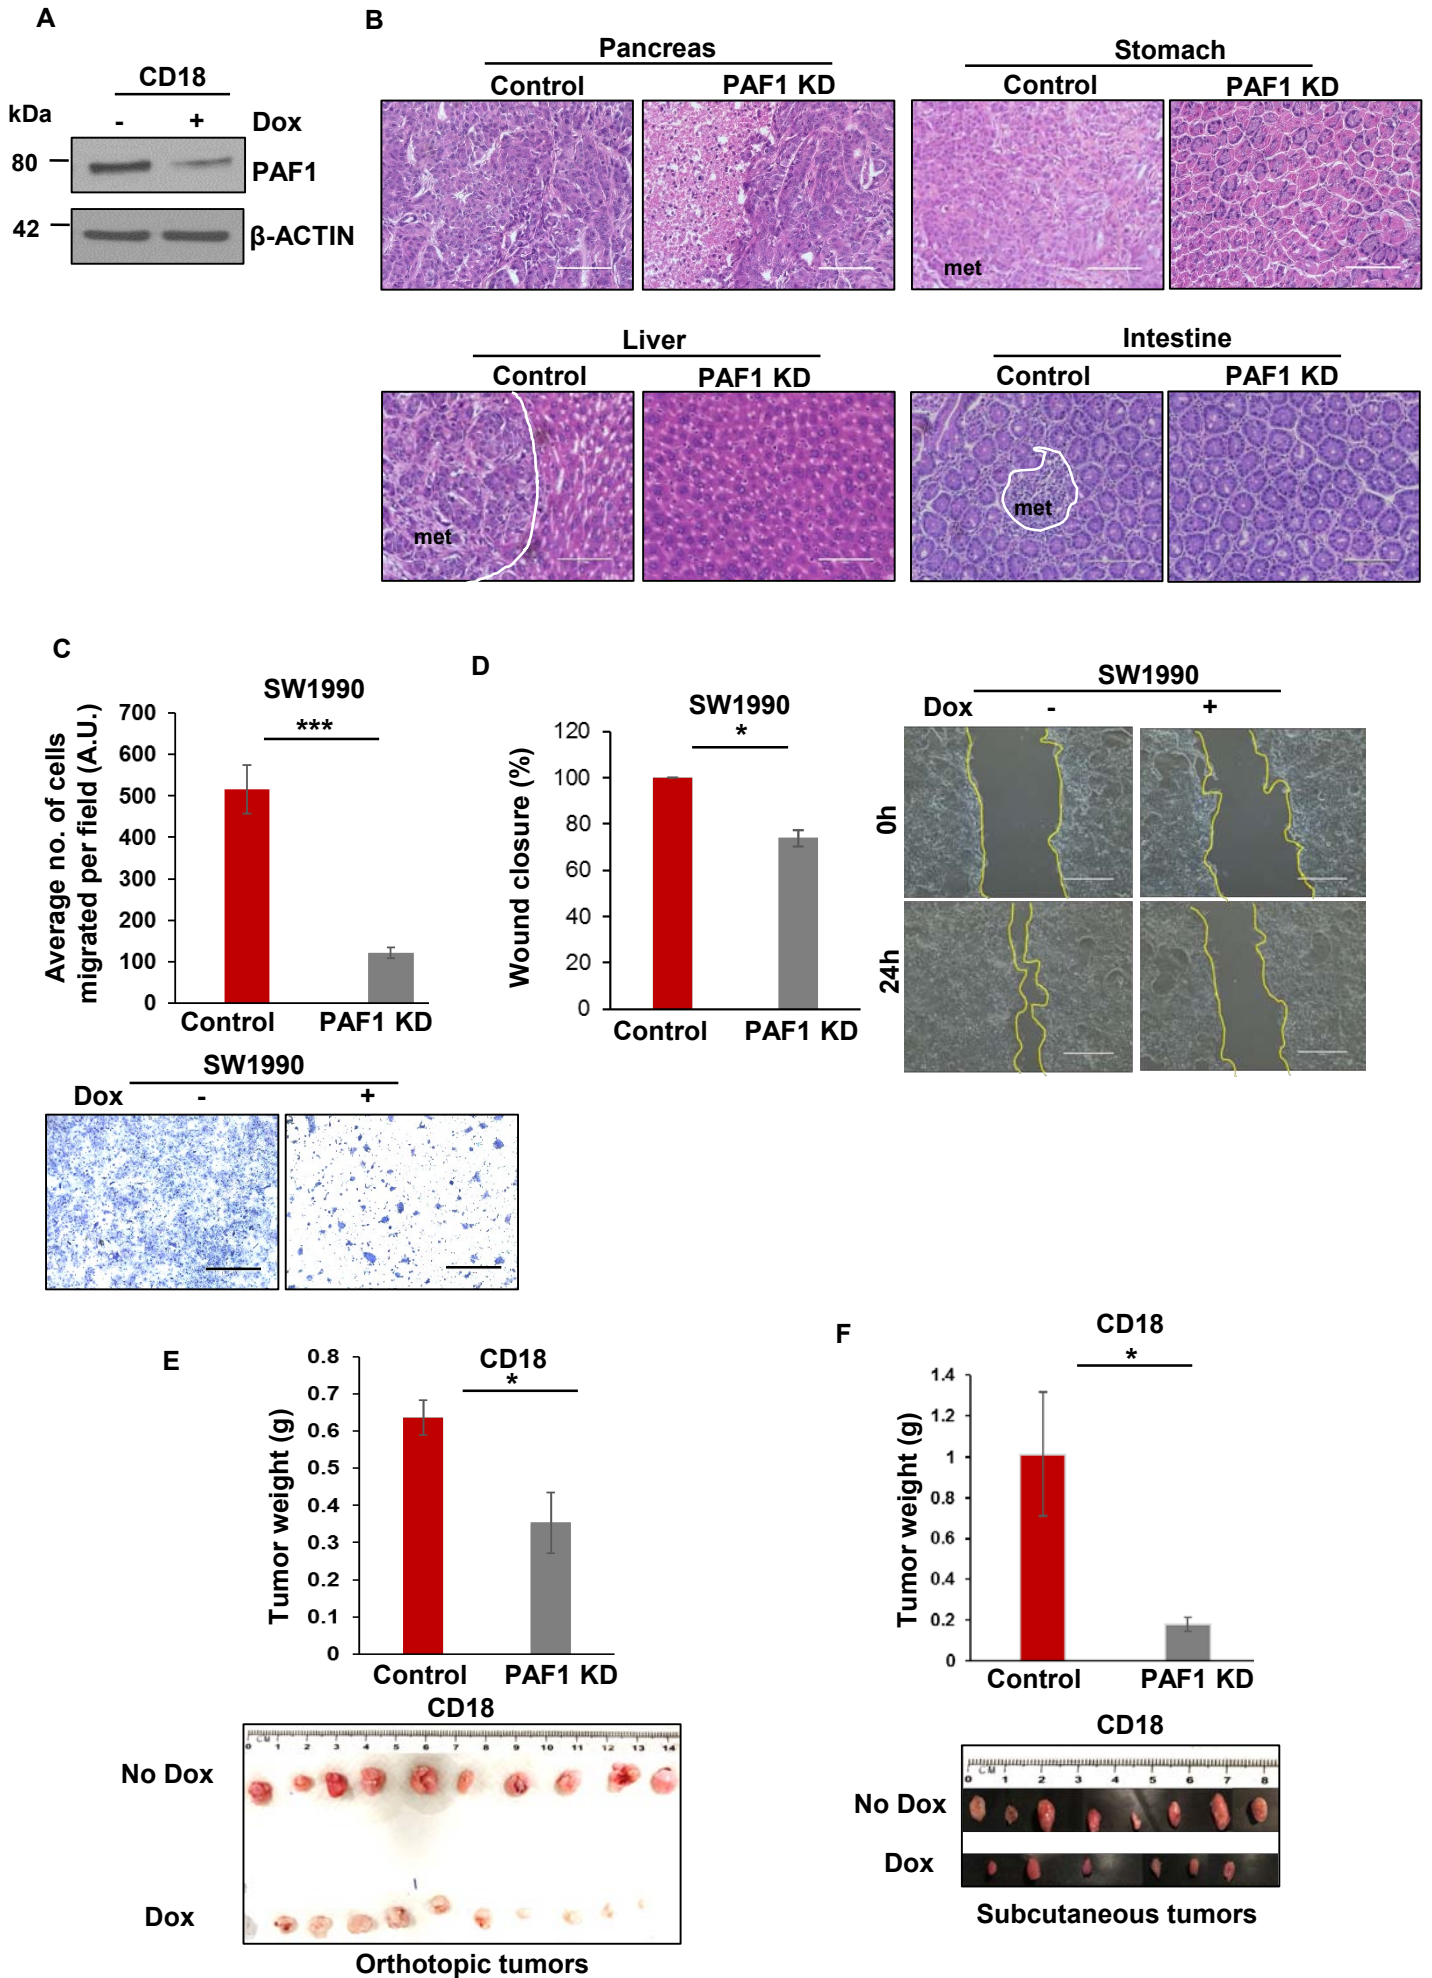

Figure S1

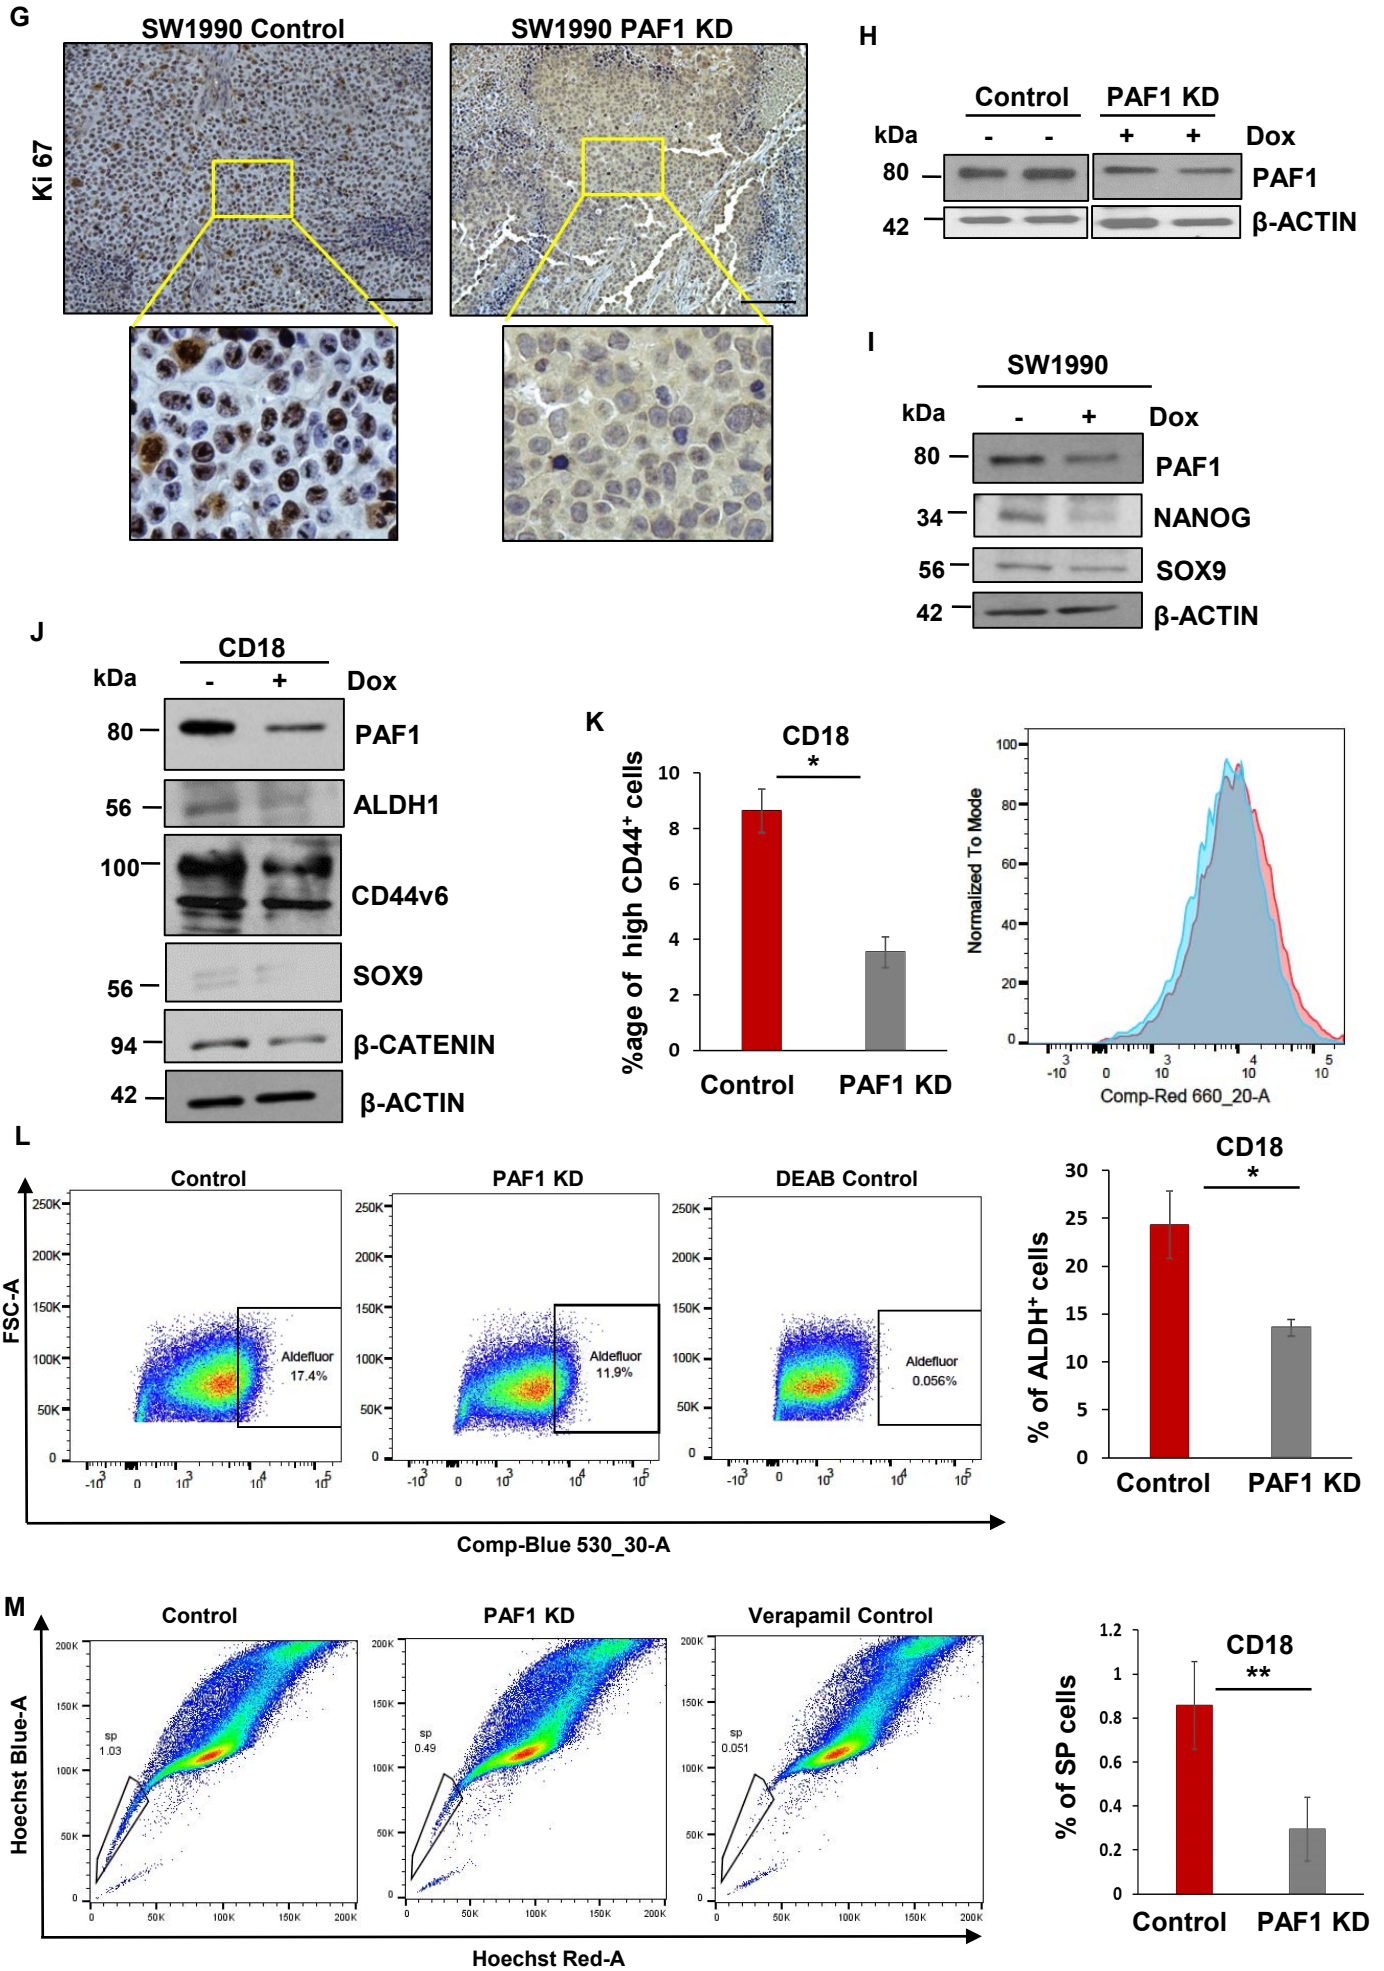

Figure S1

N

Capan1

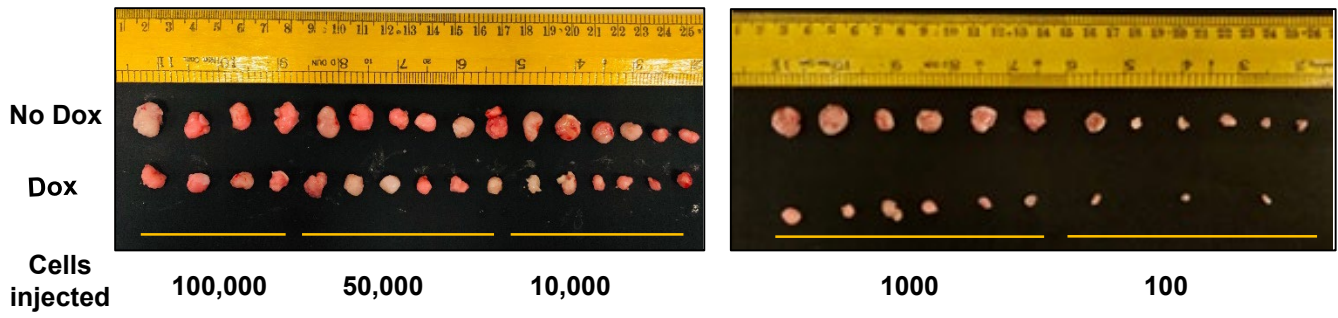

Subcutaneous tumors

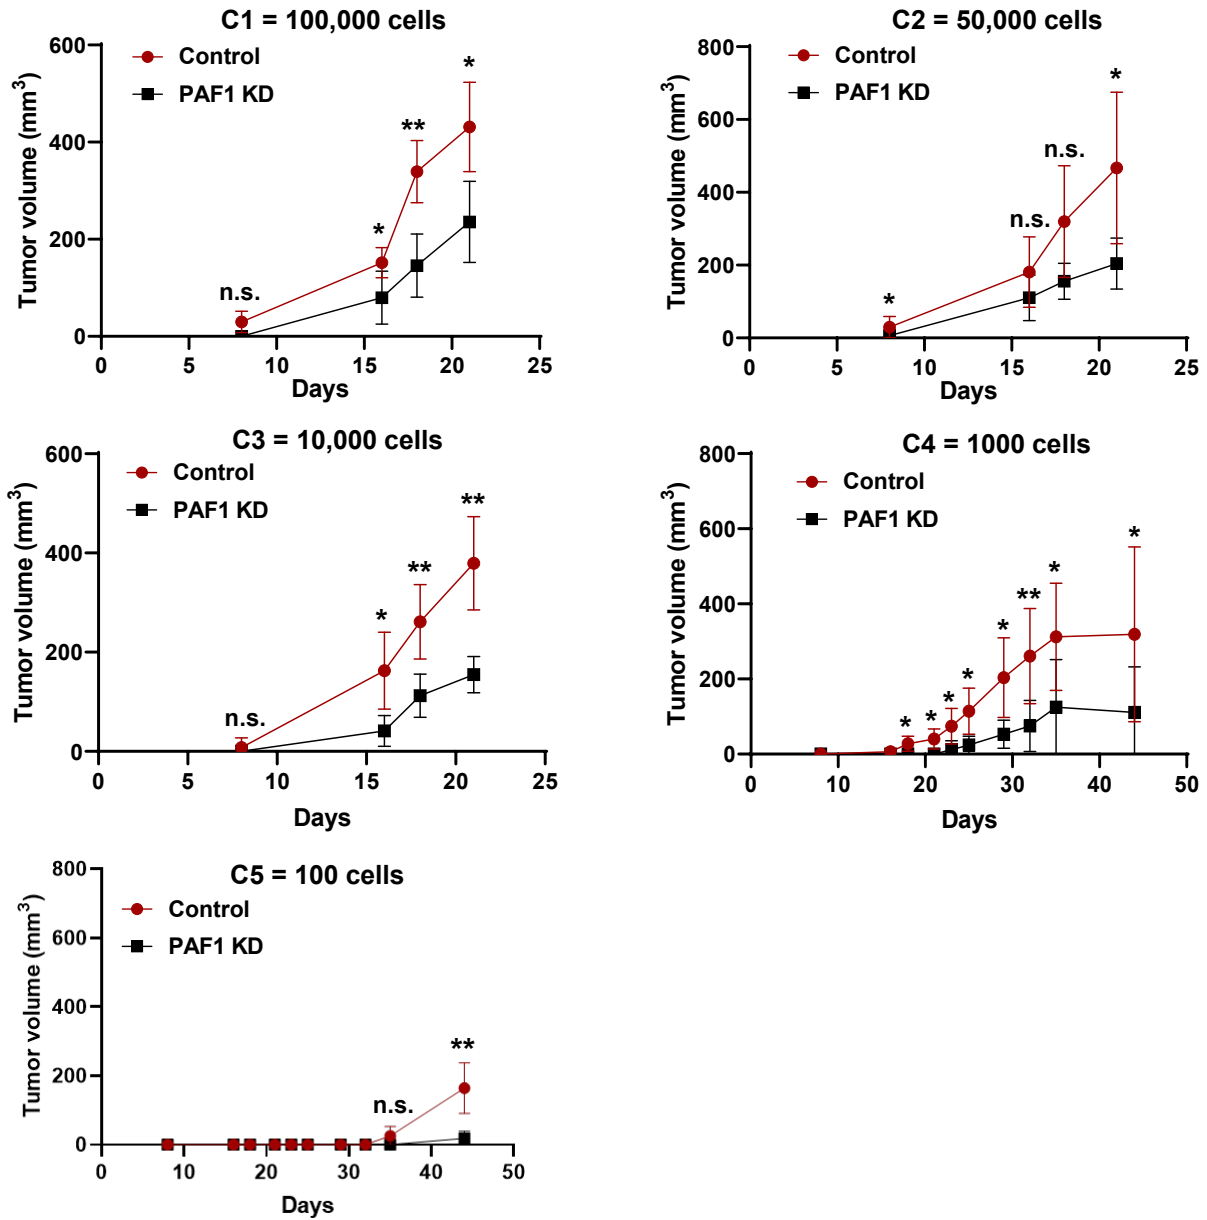

## Supplementary Figure Legends

**Figure S1: Loss of PAF1 reduces pancreatic tumorigenesis and proportions of CSCs.** **A.** Immunoblot analysis for PAF1 in CD18 cells representing the efficiency of PAF1 knockdown. **B.** Representative H and E demonstrating histology of pancreas tumor and metastases to liver, intestine, and stomach for control and PAF1-depleted Capan1 xenograft tumors. Scale bars are 1000  $\mu\text{m}$ . **C.** Quantification of the average number of migrating cells in control and PAF1-depleted SW1990 cells. Representative images are shown below. Scale bars are 1000  $\mu\text{m}$ . Data representative of three independent experiments. **D.** Graphical representation of percentage wound closure after 24 h in control and PAF1 depleted SW1990 cells. The representative images are shown on the right. Data representative of three independent experiments and error bars show mean  $\pm$  S.E. Scale bars are 1000  $\mu\text{m}$ . **E.** Mean tumor weight in control and PAF1 knockdown group generated from orthotopic implantation of CD18 cells in the pancreas of nude mice. Representative image is shown below. Tumors were harvested 6 weeks following implantation. N = 10 mice per group. **F.** Graphical representation of mean tumor weight of control and PAF1-depleted CD18 tumors generated with subcutaneous implantation. Tumors were harvested 6 weeks following implantation. Representative images are shown below. N = 4 mice per group. Both right and left flank were used for implantation. **G.** Representative immunohistochemistry images of Ki67 expression in control and PAF1 depleted SW1990 xenograft tumors. Scale bars are 1000  $\mu\text{m}$ . **H.** Immunoblot analysis of PAF1 from SW1990 control and PAF1 knockdown xenograft tumors.  $\beta$ -ACTIN was used as a loading control. **I.** Immunoblot analysis of Paf1, Nanog, and Sox9 in PAF1 depleted pancreatic tumors obtained from orthotopic implantation of SW1990 cells. **J.** Immunoblot

analysis of PAF1, CSC markers (CD44v6, ALDH1, and Lgr5), and self-renewal markers ( $\beta$ -CATENIN and SOX9) upon PAF1 depletion in CD18 cells. **K.** Percentage of high CD44<sup>+</sup> cells in control and PAF1 depleted CD18 cells. Data representative of three independent experiments. Representative histogram from one experiment is shown on the right. **L.** Representative scatter plots and quantification of the number of ALDH1<sup>+</sup> cells upon PAF1 depletion in CD18 cells. Data representative of three independent experiments. **M.** Quantification of the percentage of SP cells upon PAF1 knockdown in CD18 cells. Representative scatter plots are on the left. Data representative of three independent experiments. **N.** Capan 1 cells were subcutaneously implanted in left and right flanks of nude mice at different cell concentrations (C1 = 100,000 cells; C2 = 50,000 cells; C3 = 10,000 cells; C4 = 1000 cells; C5 = 100 cells). The top panel represents tumors harvested from control and PAF1 KD cohorts. Tumors generated from cell concentrations C1, C2, and C3 were harvested 3 weeks following implantation. Tumors generated from cell concentrations C4 and C5 were harvested 6 weeks following implantation. N = 6 tumors per cohort per cell concentrations (except C1 that had 4 tumors per cohort as one mouse died prematurely due to unknown reasons). Mean tumor volume for control and PAF1 KD cohort was plotted against the days at which the measurement was made and are depicted as graphs shown below. \*P <0.05, \*\*P <0.01, \*\*\*P <0.001.

Figure S2

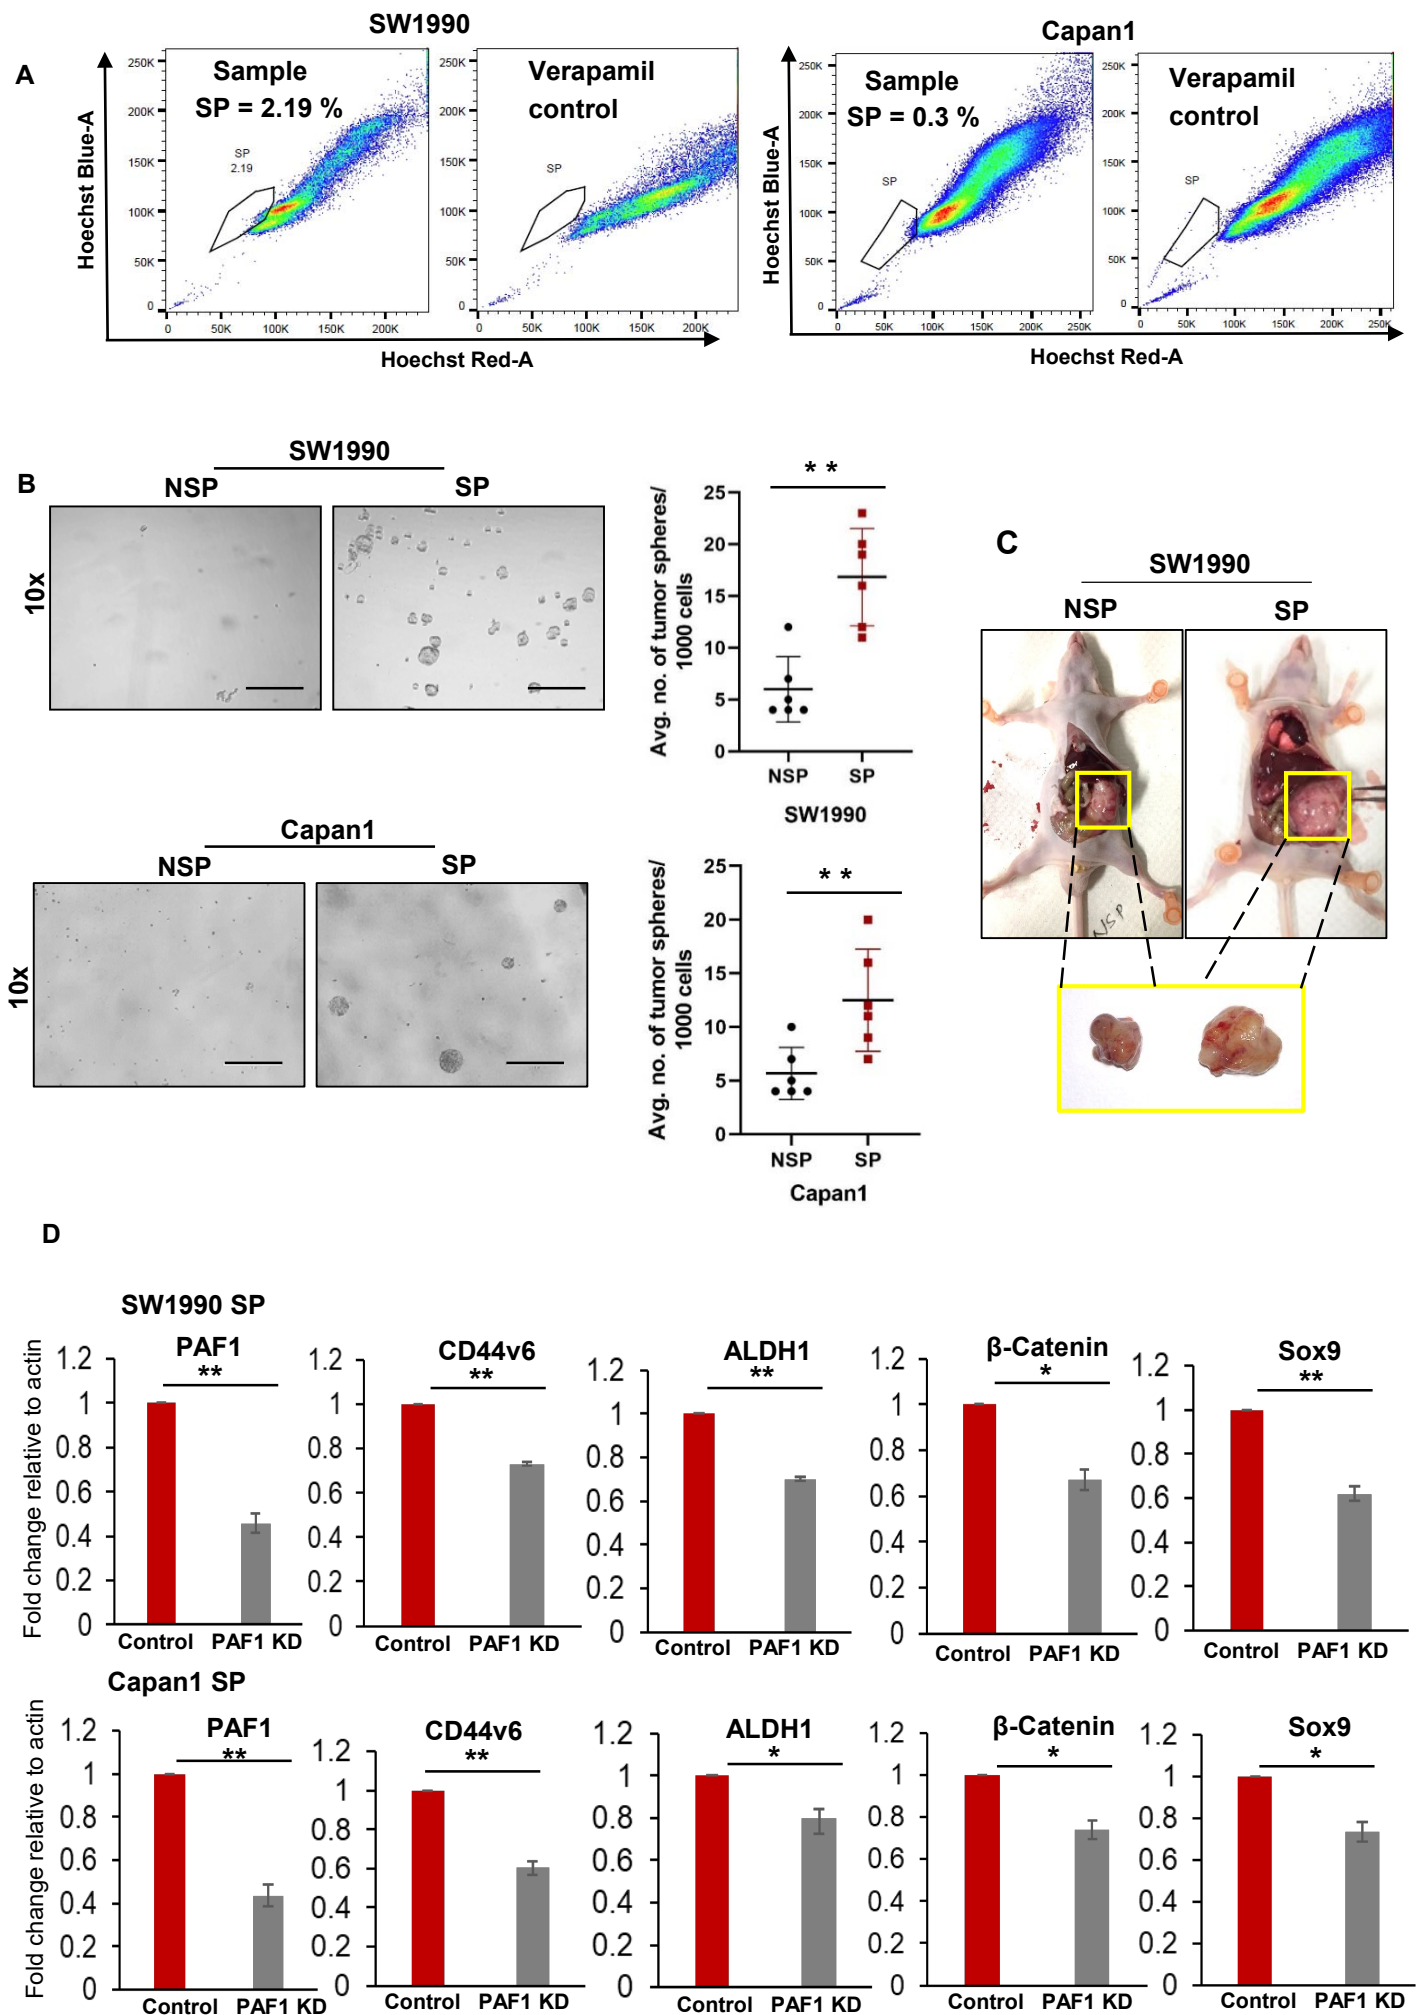



Figure S2

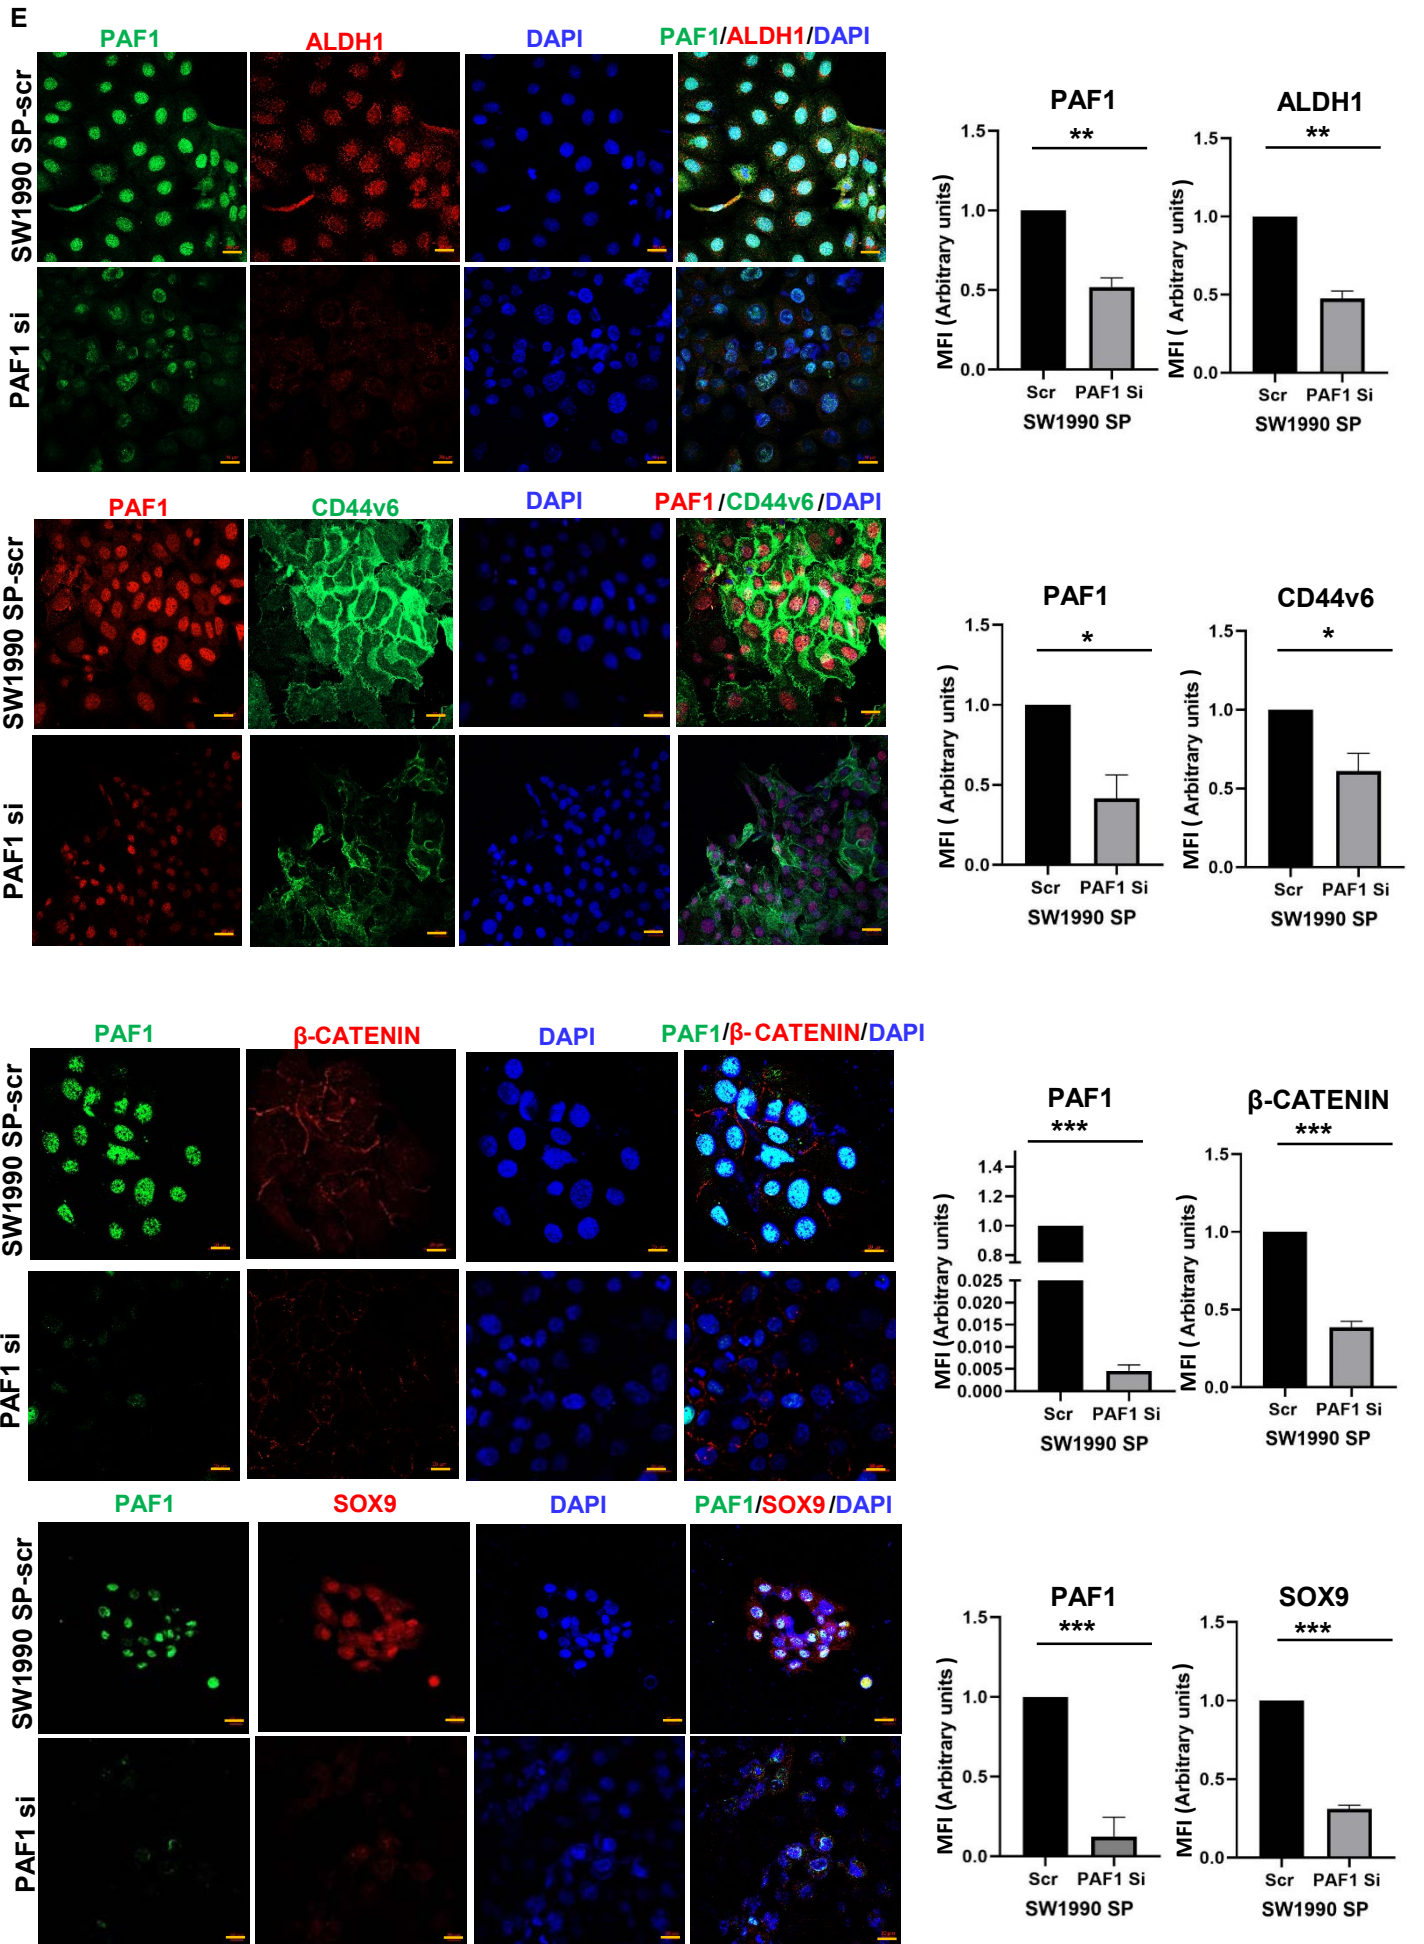

Figure S2

F

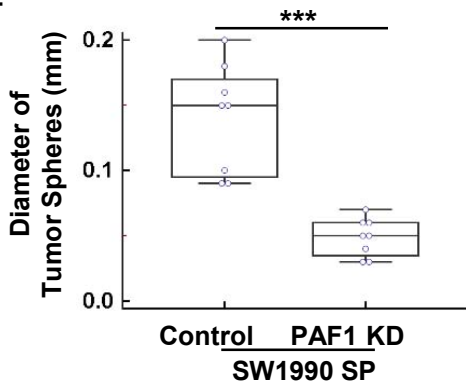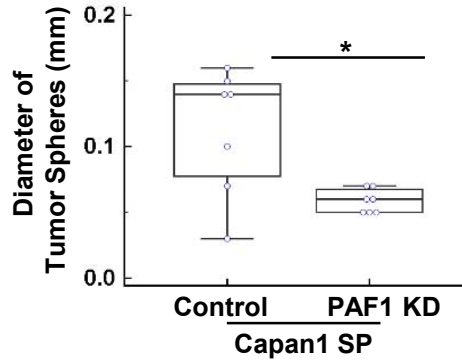

G

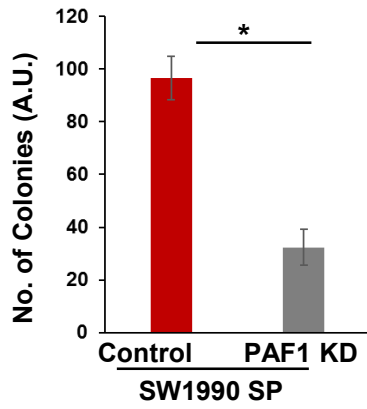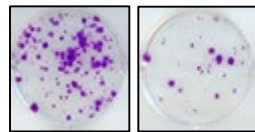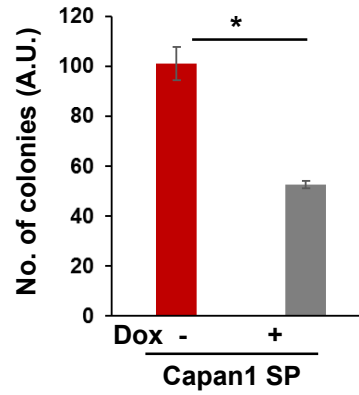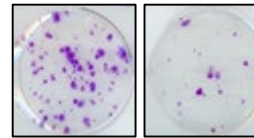

H

Orthotopically injected  $0.5 \times 10^6$  SW1990-luciferase labelled cells

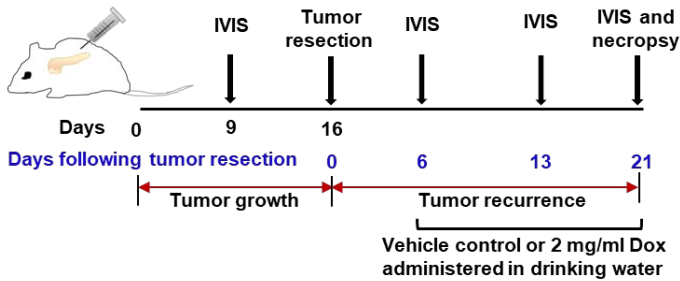

I

IVIS on Day 9 post orthotopic implantation

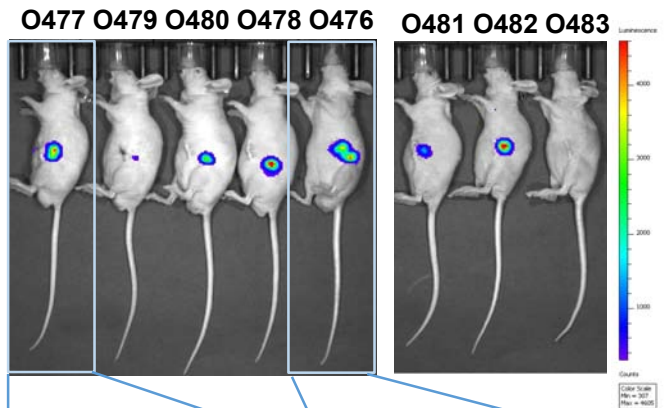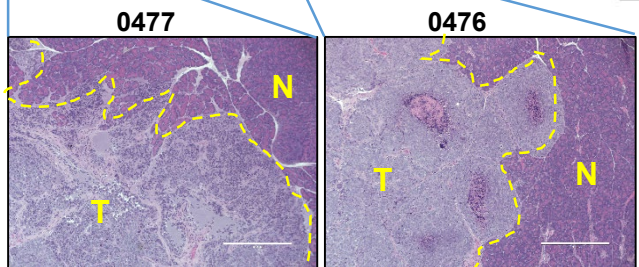

J

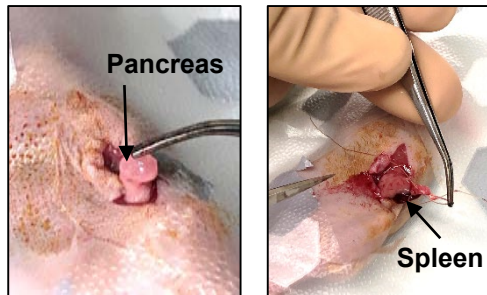

Surgical resection

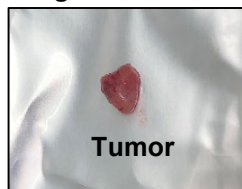

Necropsy

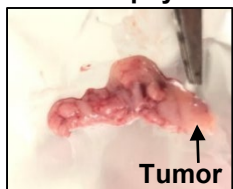

Figure S2

K

Day 6

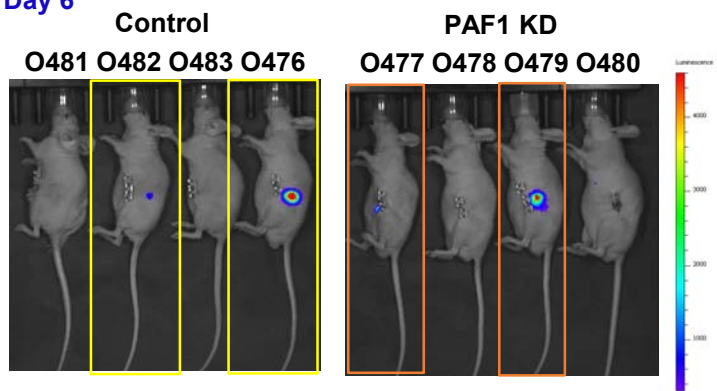

Day 13

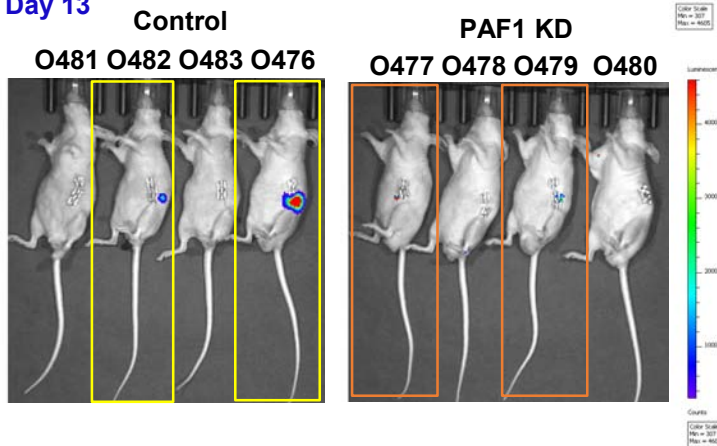

Day 21

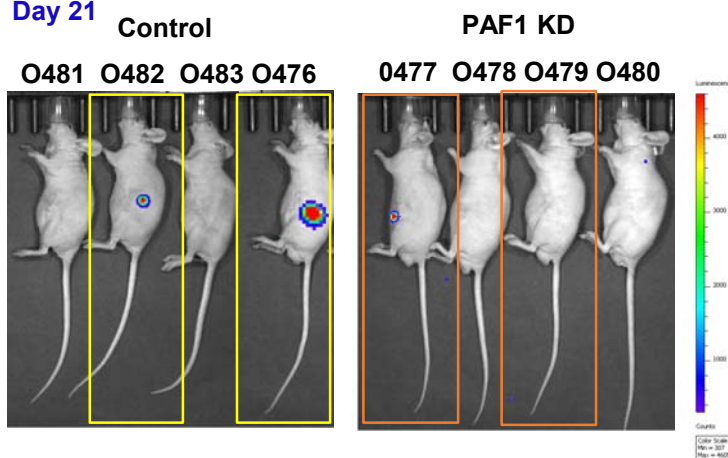

L

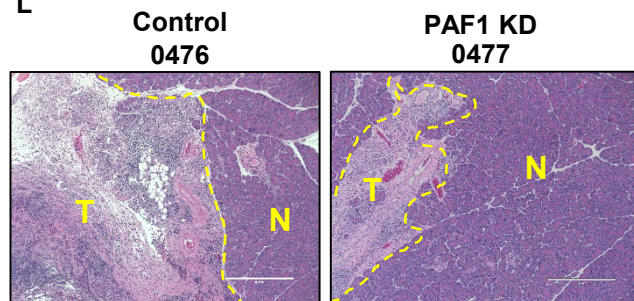

- O482 | Control
- O476 | Control
- ▲ O477 | PAF1 KD
- ▼ O479 | PAF1 KD

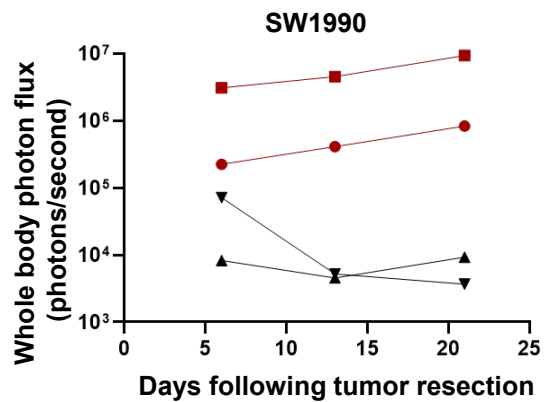

**Figure S2: PAF1 is upregulated in pancreatic CSCs and is required for sustenance of CSCs.** **A.** Flow sorting of SP and NSP cells from SW1990 and Capan1 cells. **B.** Representative images of the number and size of tumor spheres formed by SP and NSP cells from SW1990 and Capan1. Graphical representation of the average number of tumor spheres per 1000 cells (mean  $\pm$  SEM) is shown on the right side. Six replicates per cell line were used. The images were taken two weeks after seeding cells. Scale bars are 1000  $\mu$ m. **C.** Representative necropsy image of nude mice orthotopically injected with SW1990 SP and NSP cells. 100 cells were injected, and mice were euthanized 4 weeks following implantation. **D.** Quantification of PAF1, CD44v6, ALDH1,  $\beta$ -Catenin, and Sox9 transcripts in control and PAF1 depleted CSCs. Data representative of three independent experiments. Primer sequences are shown in Supplementary table 2. **E.** Immunofluorescence analysis of PAF1, CSC markers (ALDH1 and CD44v6), and self-renewal markers ( $\beta$ -CATENIN and SOX9) in control and PAF1 depleted CSCs. Quantification of MFI is shown on the right. Error bars indicate mean  $\pm$  S.D. Scale bars are 20  $\mu$ m. **F.** Quantification of diameter of tumor spheres generated by control CSCs versus PAF1 KD CSCs. **G.** Quantification of total colony area and representative images of colonies formed by control and PAF1 knockdown CSCs. Data representative of three independent experiments and error bars indicate SEM values. **H.** Scheme for surgical tumor resection, IVIS imaging, and necropsy for the assessment of tumor recurrence. **I.** Representative IVIS images from day 9 post orthotopic implantation indicating tumor formation in seven out of eight mice. **H** and **E** images depicting histology of xenograft tumors is shown below. The scale bar is 1000  $\mu$ m. **T** indicates an area of tumor cells and **N** indicates an adjacent normal area. **J.** Images showing pancreatic tumor resulting from

orthotopic implantation of PC cells and technique for the surgical resection of the tumor. Lower images depict the resected tumor mass and tumor-bearing pancreas harvested at necropsy. **K.** IVIS images from day 6, 13, and 21 post-surgical resection of xenograft tumors. Yellow boxes indicate mice from the control cohort, while orange boxes highlight the mice that belonged to PAF1 KD cohort. Quantification of photon counts for two mice from each cohort versus days post tumor resection is depicted below. **L.** Representative H and E images of pancreas harvested from control and PAF1 KD cohort at necropsy. Pancreas harvested from control mice showed both areas of cancerous and normal tissue, whereas pancreas from PAF1 KD cohort showed primarily normal areas. Scale bar is 1000  $\mu\text{m}$ . \*P <0.05, \*\*P <0.01, \*\*\*P <0.001.

Figure S3

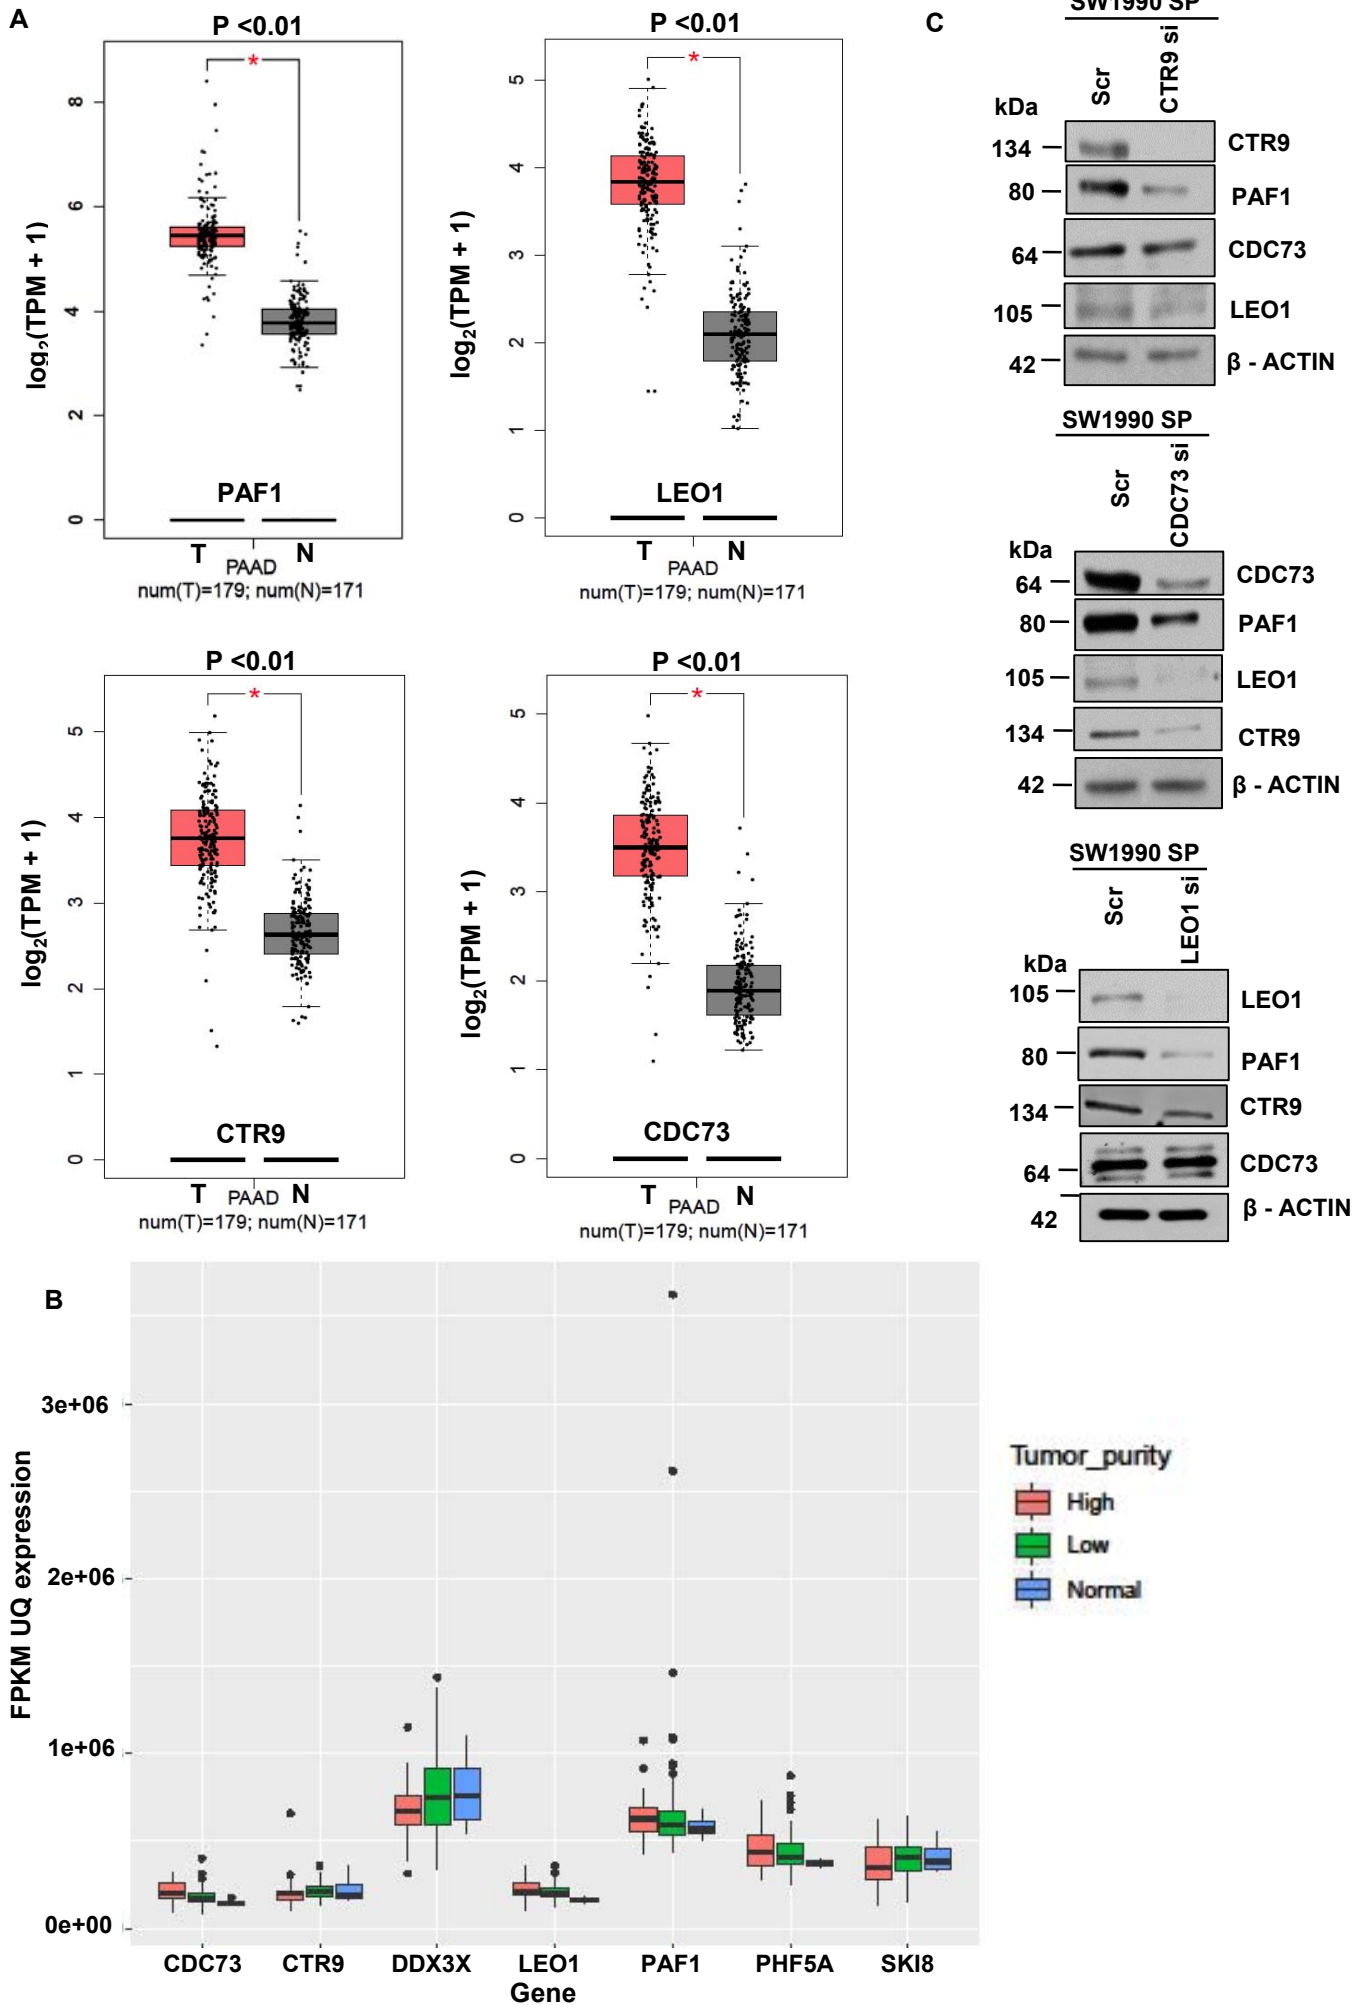

**Figure S3: Expression variation of PAF1 and other PAF1C subunits in human PC cases compared to normal pancreas.** **A.** Box plots representing the mRNA expression profiles of PAF1C subunits (PAF1, LEO1, CTR9, and CDC73) across 179 PC cases (TCGA-PAAD data) and 171 normal pancreata (GTEx data) from GEPIA database (here \*P <0.01). **B.** Box plot representing the mRNA expression profiles of PAF1C subunits (PAF1, LEO1, CTR9, CDC73, and SKI8), DDX3X, and PHF5A in high tumor purity, low purity samples, and normal pancreas tissues (TCGA-PAAD) obtained from GDC portal. **C.** Immunoblot analysis of PAF1C subunits with individual loss of CTR9, LEO1, and CDC73.

FigureS4

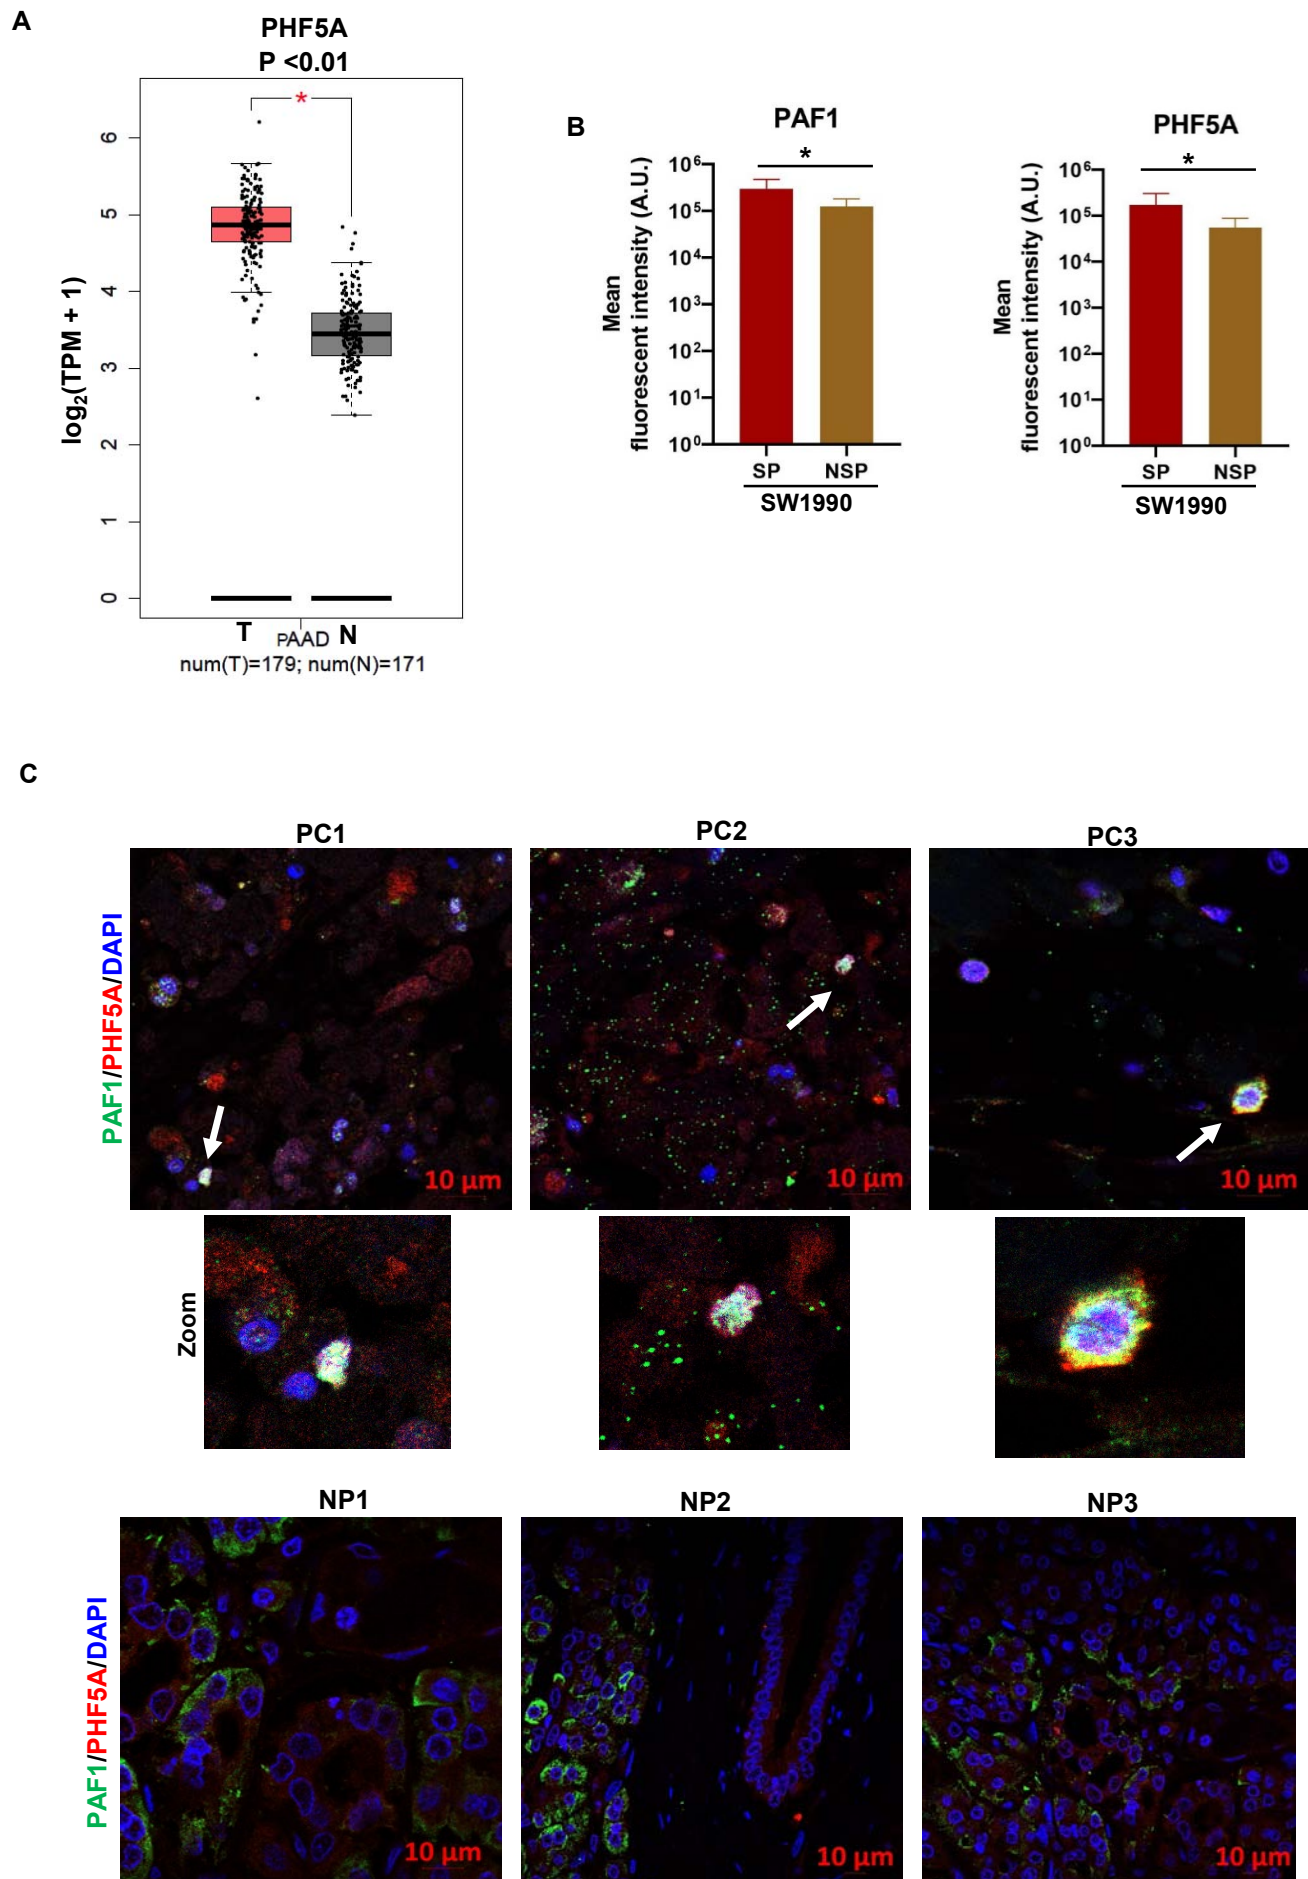



FigureS4

D

SW1990(SP) PAF1 peaks (FDR<0.05)

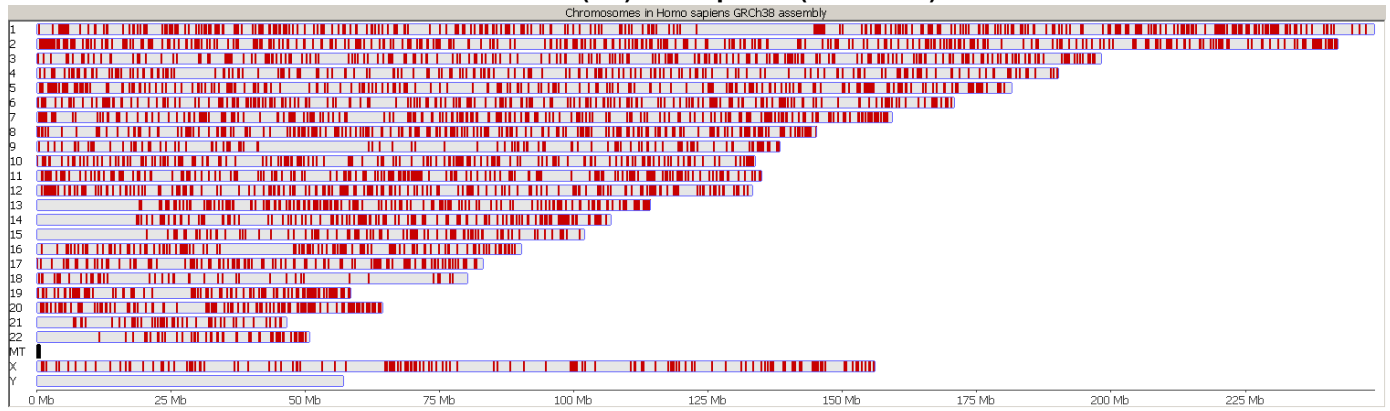

SW1990(SP) PHF5A peaks (FDR<0.05)

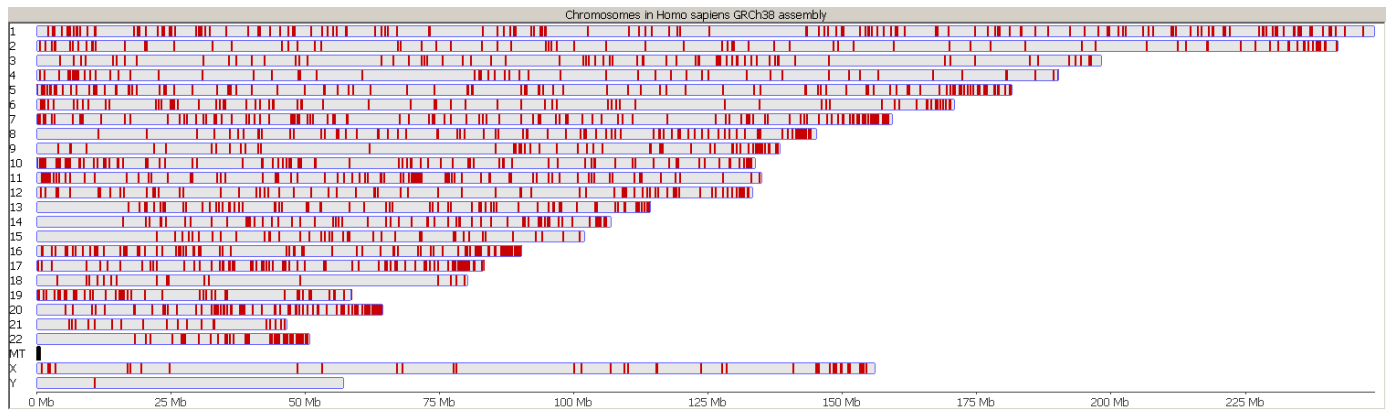

E

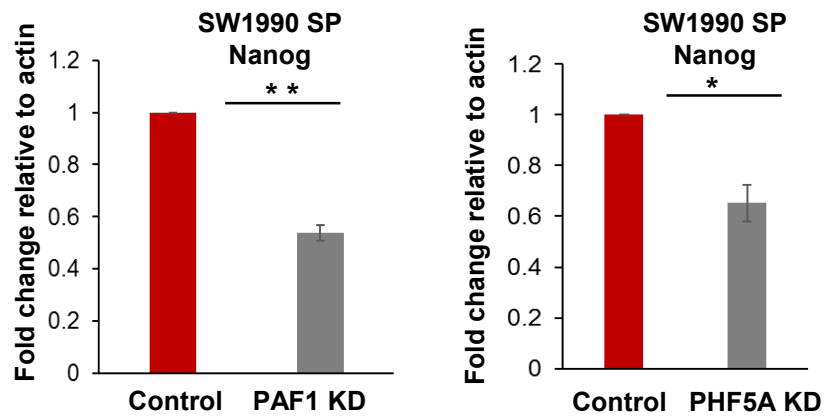

**Figure S4: PHF5A is overexpressed in pancreatic CSCs.** **A.** Box plot representing the expression of PHF5A in 171 normal pancreatic tissues (GTEx) and 179 PC (TCGA-PAAD) cases from GEPIA database (here \*P <0.01). **B.** Quantification of MFI for PAF1 and PHF5A in SP and NSP cells from SW1990. Data representative of three independent experiments. Error bars indicate mean  $\pm$  S.E. **C.** Representative immunofluorescence images depicting co-localization of PAF1 with PHF5A in distinct cancer cells within human PC tissues (white arrows). Zoomed images of individual cells showing co-localization are represented in the middle panel. Lower panel shows the expression of PAF1 and PHF5A in normal pancreas. **D.** Chromosome-wide distribution of PAF1 and PHF5A peaks in SW1990 SP cells at a false discovery rate of less than 0.05. **E.** Bar plots representing the expression of Nanog in control versus PAF1 depleted and control versus PHF5A depleted CSCs. Data representative of three independent experiments and error bars indicate mean  $\pm$  S.E. \*P <0.05, \*\*P <0.01, \*\*\*P <0.001.

FigureS5

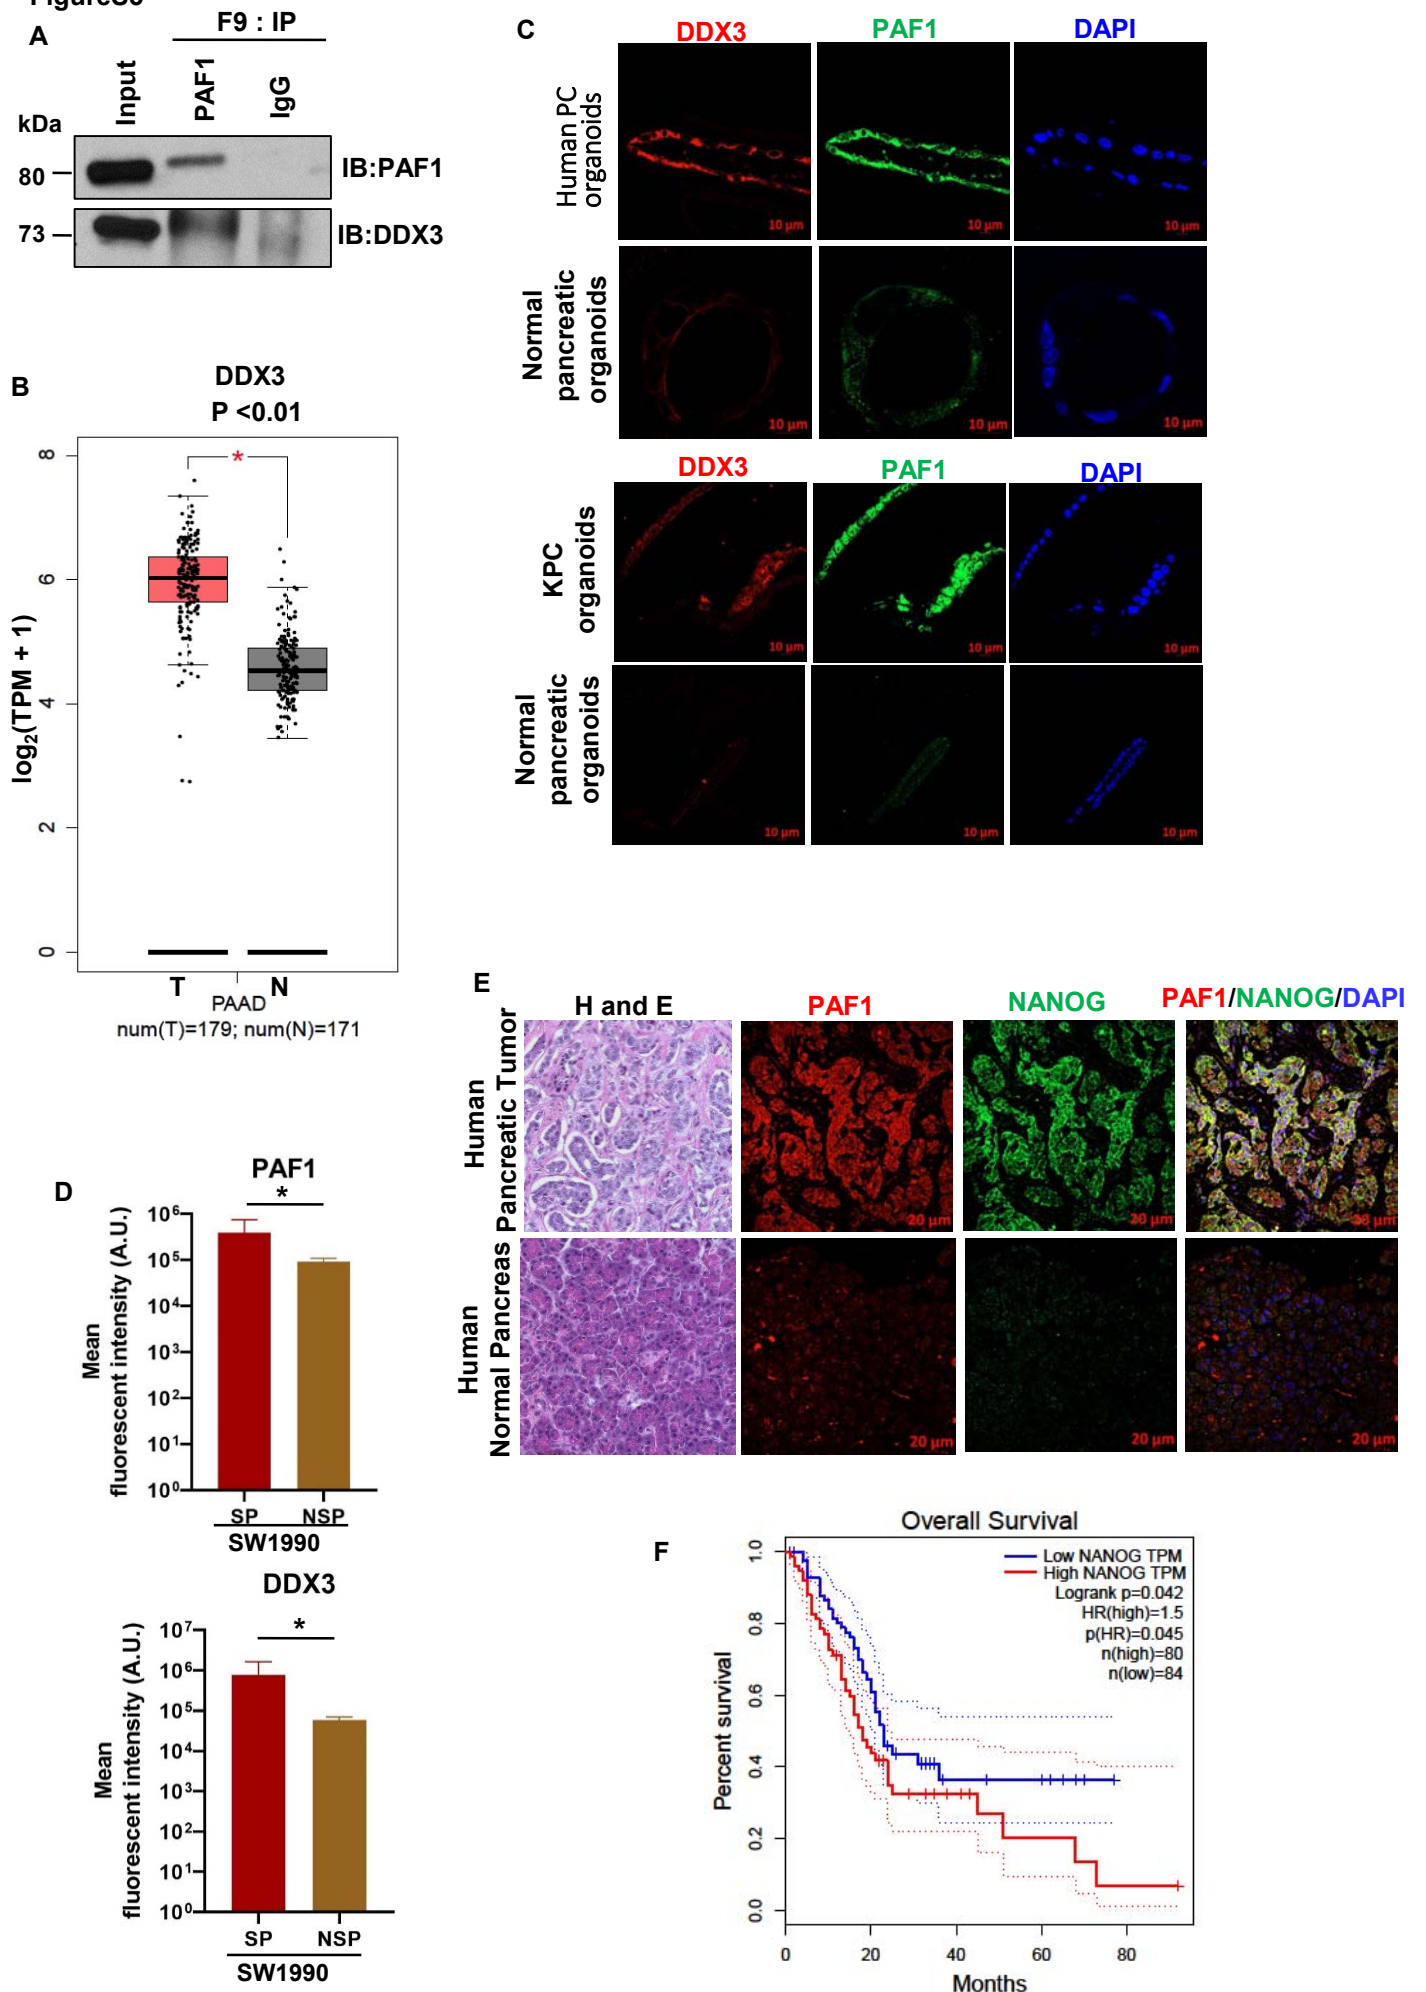

**Figure S5: DDX3 is a novel PAF1 interacting partner that is overexpressed in pancreatic CSCs.** **A.** Immunoprecipitation analysis with PAF1 from F9 cells followed by immunoblotting with PAF1 and DDX3. **B.** Box plot representing expression of DDX3 in normal (171 cases) and human PC tissues (179 cases) obtained from GEPIA database (\*P <0.01). **C.** Immunofluorescence analysis of PAF1 and DDX3 in human PC and normal pancreatic organoids (top panel), and in mouse KPC and normal pancreatic organoids (lower panel). Data representative of two independent experiments. **D.** Mean fluorescence intensity of PAF1 and DDX3 in SP and NSP cells from SW1990. Data representative of two independent experiments (\*P <0.05). **E.** Immunofluorescence analysis of PAF1 and NANOG in human PC tissues and normal pancreas. Tissue histology is represented on the left as Hematoxylin and Eosin stained images. **F.** Kaplan-Meier survival curve for overall survival of PC patients with high and low Nanog expression extracted from GEPIA database.

FigureS6

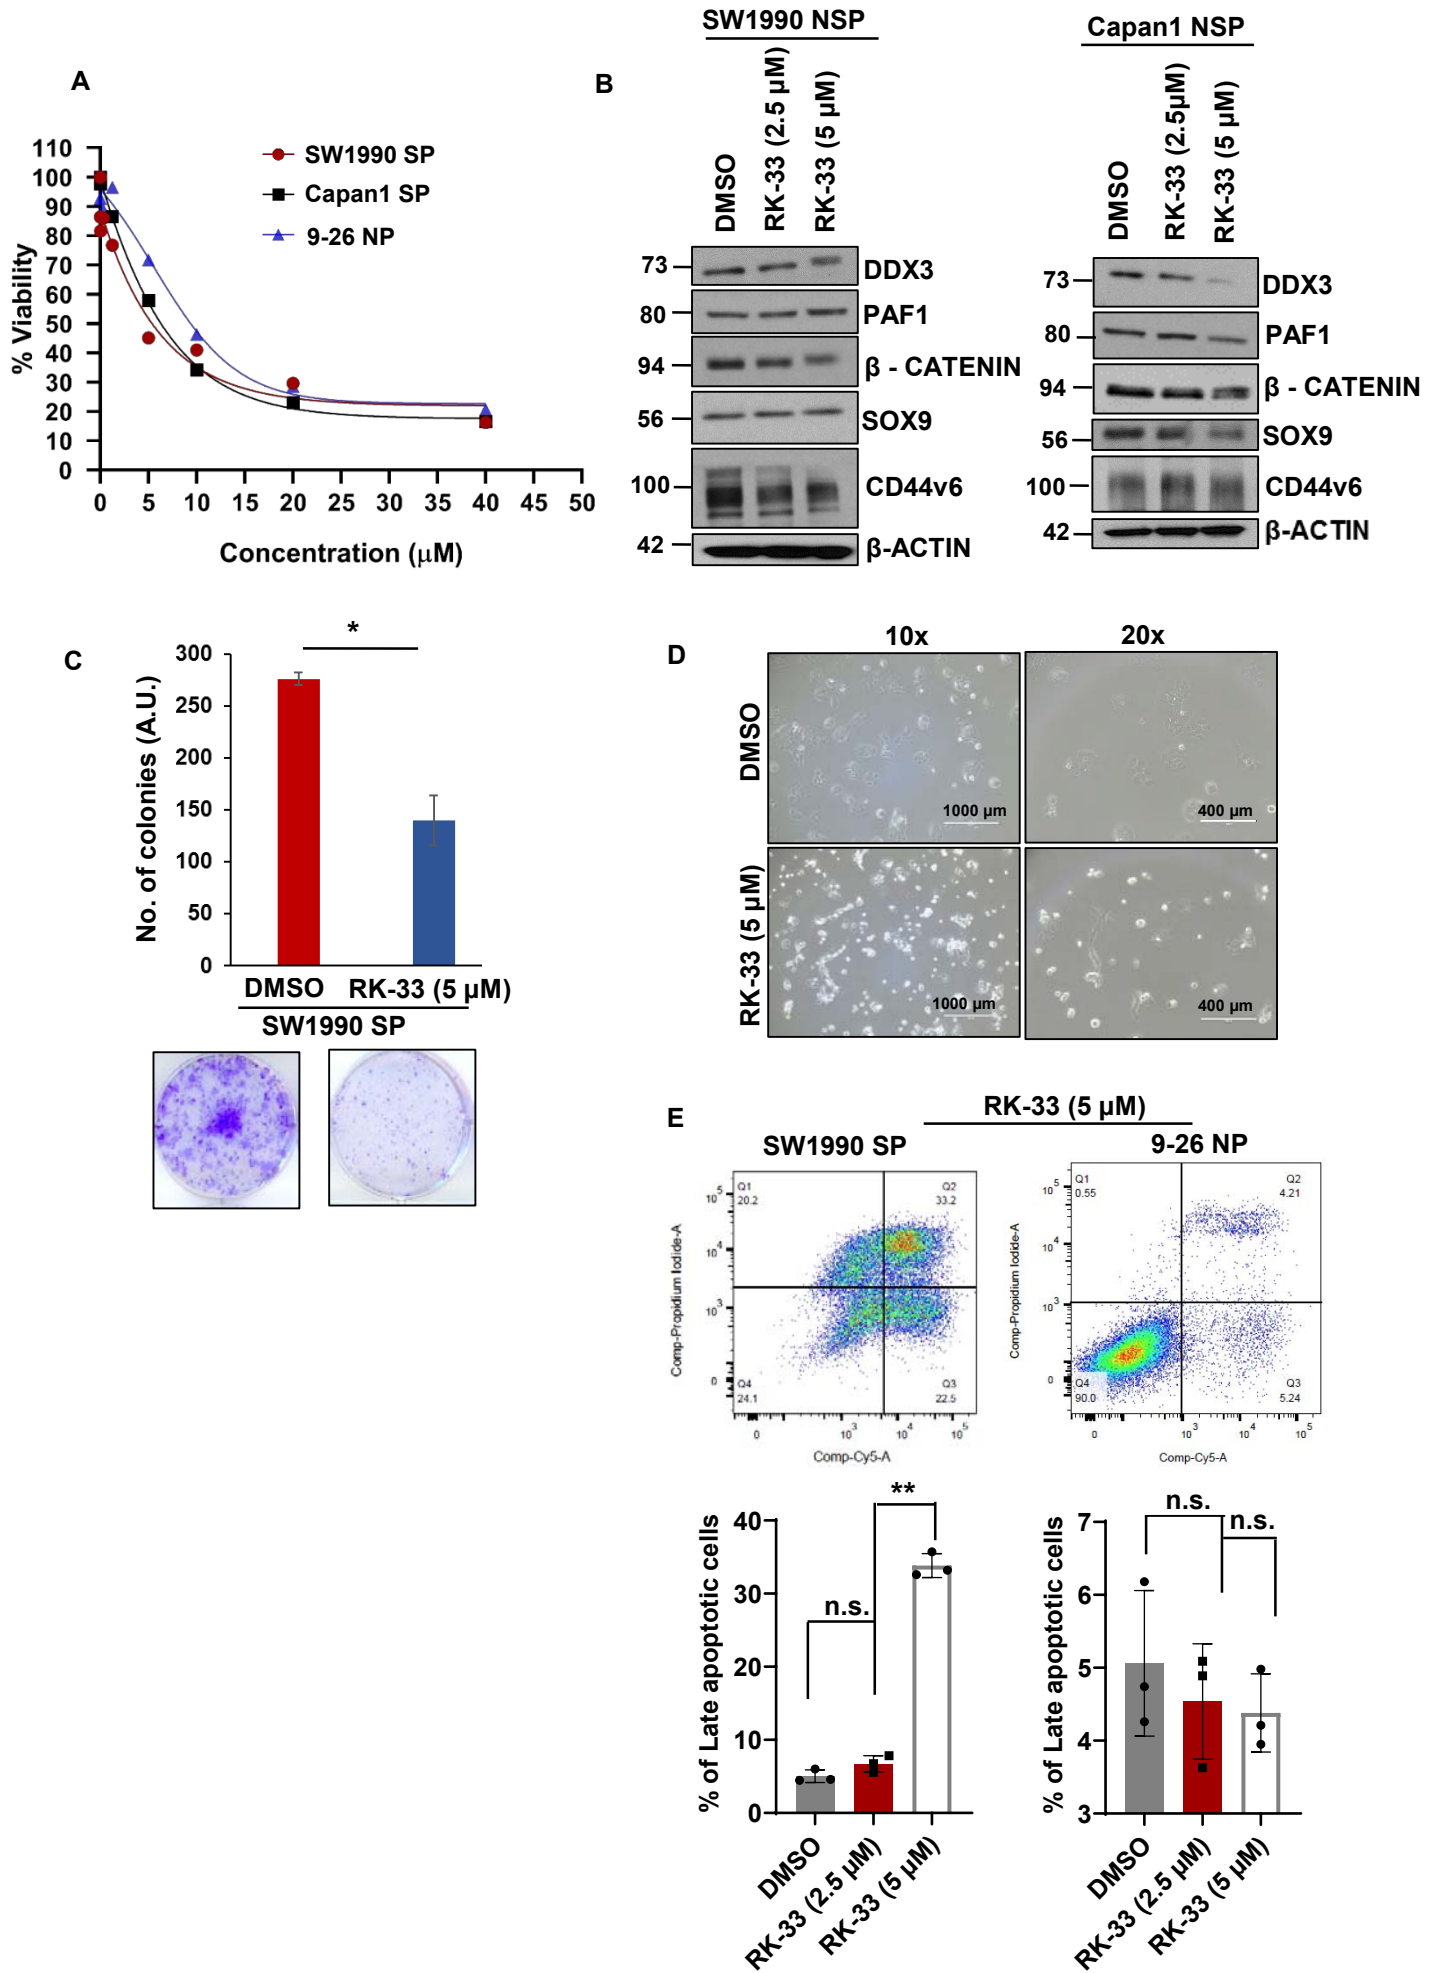

**Figure S6: DDX3 inhibitor RK-33 reduces colony formation ability of pancreatic CSCs and induces apoptosis. A.** Growth curve representing IC<sub>50</sub> values for RK-33 in SW1990 SP cells, Capan1 SP cells and 9-26 NP fibroblasts. IC<sub>50</sub> values are: SW1990 SP = 4.32 μM, Capan1 SP = 5.53 μM, and 9-26 NP = 9.23 μM. SEM values are: SW1990 SP = 0.040, 0.027, 0.042, 0.038, 0.015, 0.022, 0.014, 0.016, 0.014; Capan1 SP = 0.064, 0.036, 0.067, 0.039, 0.069, 0.017, 0.010, 0.010; and 9-26 NP = 0.060, 0.068, 0.077, 0.051, 0.117, 0.062, 0.017, 0.010. **B.** Immunoblotting analysis for DDX3, PAF1, CD44v6, SOX9, and β-CATENIN with RK-33 treatment in SW1990 NSP and Capan1 NSP cells for 48 h. β-ACTIN was used as a loading control. **C.** Graphical representation of total colony area in a colony formation assay with control and RK-33 (5 μM)-treated SW1990 SP cells. Data representative of three independent experiments and error bars indicate SEM values. Cells were treated for 48 h and colonies were stained 15 days following seeding. **D.** Representative images for morphology of SW1990 SP cells following treatment with RK-33 (5 μM) for 48 h. **E.** Scatter plots demonstrating apoptotic cells following 48 h treatment with RK-33 (5 μM) in SW1990 SP and 9-26 NP cells. Quantification of percentage of late apoptotic (Annexin V and PI double positive) cells is shown below. \*P <0.05, \*\*P <0.01, \*\*\*P <0.001. n.s. = non-significant.

FigureS7

A

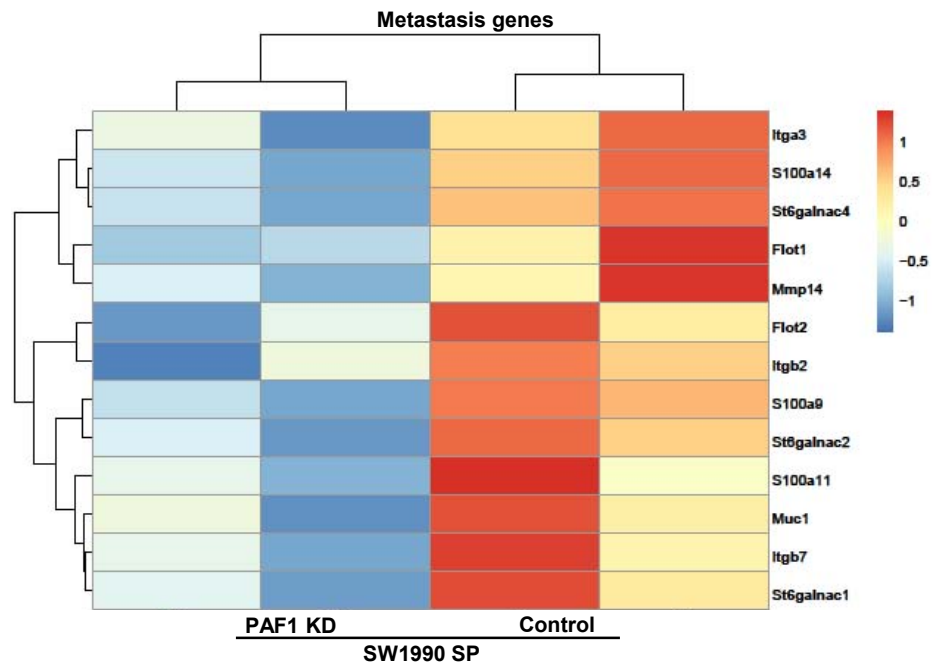

B

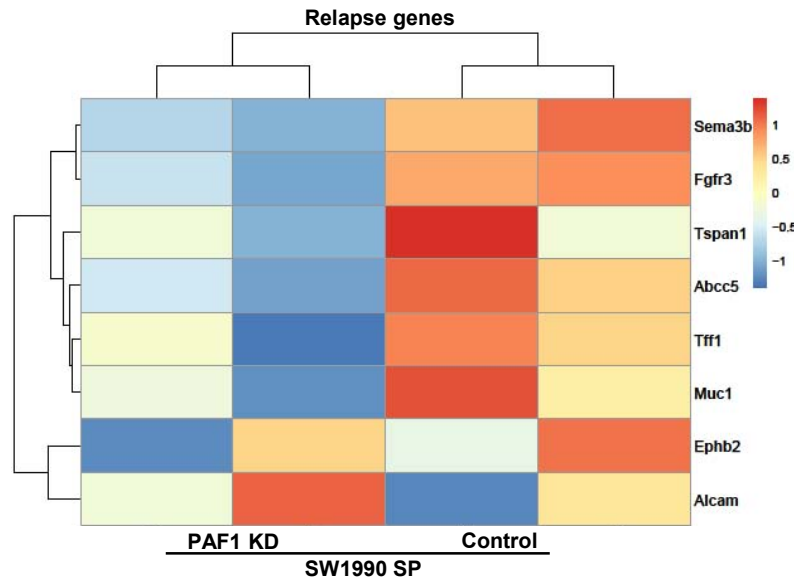

C

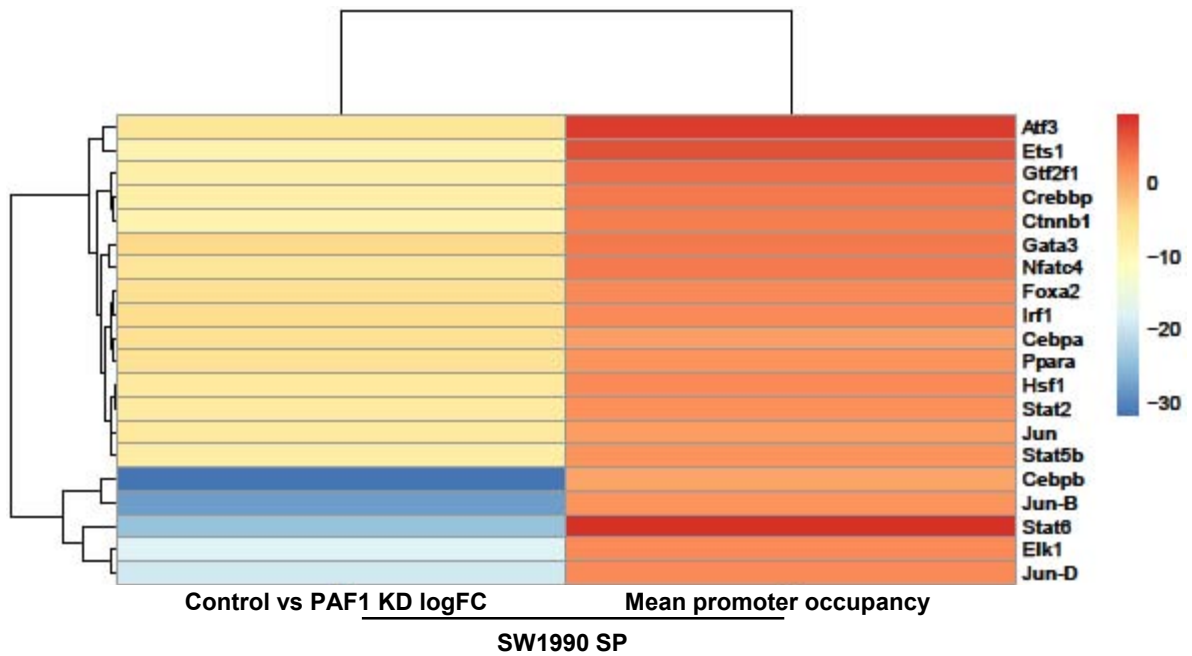

**Figure S7: PAF1 regulates an array of stem cell genes.** **A.** Heatmap of differentially expressed metastasis-promoting genes in control and PAF1 depleted SW1990 SP cells. **B.** Heatmap of differentially expressed relapse genes in control and PAF1 depleted SW1990 SP cells. **C.** Heatmap representing differential fold expression of genes downregulated upon PAF1 depletion using PCR array (left panel) and mean promoter occupancy of PAF1 on these gene promoters (right column).



## Supplemental Methods

### ***In silico* analysis of PAF1C subunits, PHF5A, and DDX3 in PC data sets**

The GEPIA web server (<http://gepia.cancer-pku.cn/>) was used to analyze TCGA PC expression data. Herein, expression data for PAF1, CTR9, LEO1, CDC73, SKI8, PHF5A, and DDX3 were obtained. The data were downloaded using the web portal and subsequently plotted<sup>1</sup>. The normalized PAAD gene expression data (FPKM-UQ) was obtained from Genomic Data Commons (GDC) web portal (<portal.gdc.cancer.gov>). Grouped boxplots of PAF1, other PAF1C subunits, DDX3, and PHF5A were made using the ggplot2 package in R. The boxplots were grouped based on the ABSOLUTE purity classifications, as provided by Raphael et al., 2017<sup>2</sup>.

### **Orthotopic tumor implantation**

SW1990, Capan1, and CD18 cell lines were engineered for inducible PAF1 knockdown using a lentiviral system; these cell lines were injected in the pancreas of 5-week-old athymic nude mice orthotopically as described previously<sup>3</sup>. Doxycycline hyclate (Sigma-Aldrich) was administered to mice assigned to the PAF1 KD group via drinking water at a concentration of 2 mg/ml in 2% sucrose solution. Control mice received 2% sucrose in drinking water.

### **Subcutaneous tumor implantation**

Control and PAF1 KD cells (40,000) were suspended in 500  $\mu$ l of PBS and mixed with Matrigel (Fisher Scientific) in a 1:1 ratio. Cells (4,000) in 100  $\mu$ l volume of PBS-matrigel mix were injected subcutaneously into the right and left flanks of 5-week-old athymic nude mice. Four mice were used per group, and the appearance of tumors was checked by palpitation two times per week. Animals were sacrificed soon after the tumor nodule reached 0.8 cm diameter.

### **Determination of tumor recurrence *in vivo***

Tumor recurrence has previously been evaluated in mouse models of PC<sup>4</sup>. Briefly,  $0.5 \times 10^6$  luciferase labelled SW1990 cells were orthotopically implanted in 6 week-old nude mice. Tumor formation was ascertained using IVIS. Two weeks post-implantation of cancer cells in the pancreas, tumors were resected as described previously<sup>4</sup>. The primary tumor in the pancreatic

tail was carefully removed by disconnecting the pancreatic body, including blood vessels, by using one clip followed by coagulation and cutting. We confirmed negative margins after the resection to ensure complete tumor removal. Six days after tumor resection, mice were imaged using IVIS to assess tumor burden, and mice were then randomized into two groups: control and PAF1 KD. Mice segregated into PAF1 KD received doxycycline (2 mg/ml) in 2% sucrose in drinking water, and the other group received 2% sucrose only (vehicle control). Tumor-bearing mice in both groups were followed for three weeks and tumor recurrence was evaluated using IVIS and histological analysis at the endpoint.

### **Limiting dilution assay**

Cell suspension of Capan1 cells was prepared for five different concentrations (C1 = 100,000 cells; C2 = 50,000 cells; C3 = 10,000 cells; C4 = 1000 cells; C5 = 100 cells) in a 50  $\mu$ l volume of PBS. Cells were mixed with 50  $\mu$ l Matrigel and were subcutaneously implanted into the right and left flanks of 5-week-old athymic nude mice. Mice were segregated into two groups: control and PAF1 KD. Three mice were used per group per cell concentration (6 tumors in each group/cell concentration), and the appearance of tumors was checked by palpitation thrice per week. Tumor dimensions were measured using Vernier Calipers for the determination of tumor volume. Tumors were harvested when control tumors became necrotic.

### **Organoid generation and culture**

In brief, tumor organoids were established after tumor resection, mechanical and enzymatic digestion of pancreatic tumor from KPC autochthonous mouse model with 0.012% (w/v) collagenase XI (Sigma) and 0.012% (w/v) dispase (GIBCO) in DMEM media containing 1% FBS (GIBCO) and embedded in growth factor reduced (GFR) Matrigel (BD)<sup>5</sup>. These organoids were maintained and cultured in complete AdDMEM/F12 medium supplemented with HEPES (Invitrogen), Glutamax (Invitrogen), penicillin/streptomycin (Invitrogen), B27 (Invitrogen), Primocin (1 mg/ml, InvivoGen), N-acetyl-L-cysteine (1 mM, Sigma), mouse recombinant Wnt3a (100 ng/ml, Milipore), human recombinant RSpondin1 (1  $\mu$ g/ml, Nuvelo), Noggin (0.1 mg/ml,

Peprtech), epidermal growth factor (EGF, 50 ng/ml, Peprtech), Gastrin (10 nM, Sigma), fibroblast growth factor 10 (FGF10, 100 ng/ml, Preprotech), Nicotinamide (10 mM, Sigma), and A83-01 (0.5 mM, Tocris). Human organoids were derived from the pancreas tissue obtained from fresh tissue bank at UNMC and cultured using the same protocol as followed with mouse organoids with the addition of Wnt3A (1X (50% V/V), Preprotech).

### **ALDEFLUOR Assay**

The cells expressing high levels of activity of the enzyme aldehyde dehydrogenase (ALDH) were stained using ALDEFLUOR reagent (Stem Cell Technologies, Cambridge, MA, USA. Cat: 01700) using the manufacturer's instructions. A specific inhibitor of ALDH, diethylaminobenzaldehyde (DEAB), was used to control for background fluorescence.

### **Analysis of CD44<sup>+</sup> CSCs using flow cytometry**

Cells were trypsinized, counted, and resuspended to get one million cells/100 µl per tube. Cells were incubated with human CD44-APC antibody (Miltenyi Biotec Inc. Auburn, CA, USA .Cat:130-098-110) for 15 minutes at 4 °C, followed by two PBS washes and resuspension in 500 µl media. Appropriate single and double color controls were included, and cells with a high expression of CD44<sup>+</sup> (high CD44<sup>+</sup>) were gated using appropriate controls.

### **Apoptosis Assay**

SW1990 SP and 9-26 NP cells were treated with vehicle control DMSO or RK-33 (5M) for 48 h. Cell supernatant and adherent cells were collected, stained with annexin V and propidium iodide (PI), and analyzed by flow cytometry as described previously<sup>6</sup>.

### **Immunoblot Assay**

Cells were processed for protein isolation and Western Blotting using standard procedures, as described previously<sup>7</sup>. The following primary antibodies were used: anti-PAF1, anti-LEO1, anti-CDC73, anti-CTR9 (Bethyl Laboratories, Montgomery, TX, USA); anti-PHF5A (Proteintech, Rosemont, Illinois, USA); anti-OCT3/4, anti-SOX-2, anti-CD24, anti-ESA (Santa Cruz Biotechnology, Dallas, TX, USA); anti-CD44 (Cell signalling Technology, Danvers, MA, USA);

anti-CD133 (Abnova, Walnut, CA, USA); anti- $\beta$ -Catenin (Sigma); anti-DDX3, anti-Lgr5, and anti-SOX-9 (Abcam, Cambridge, MA, USA). All antibodies were incubated overnight at 4 °C.  $\beta$ -ACTIN was used as a loading control.

### **Immunofluorescence analysis**

Cells were plated, fixed, and processed as described previously<sup>7</sup>. Primary antibodies specific for mouse-PAF1 (1:100 in PBS), mouse-OCT3/4 (1:100), rabbit- $\beta$ -CATENIN (1:100), mouse-CD44 (1:250), and rabbit-ESA (1:1500) were used with a 4 h incubation for cells. For human and mouse tissues, we followed the same procedure mentioned previously<sup>8</sup>, but incubation with primary antibodies was performed overnight at 4 °C. Following primary antibody incubation, the cells and tissue sections were processed using standard procedures, as described previously<sup>7</sup>. Confocal images were collected using Zeiss LSM800 confocal microscope with a 63x/1.4 NA oil objective.

Quantification of fluorescent intensity: Multichannel snapshots were split into separate channels in ImageJ. A region of interest was drawn around individual cells in one of the two channels using the “freehand” tool. This region was then subjected to the measure plugin, and intensity was calculated by multiplying area and mean intensity. The measurement of intensity was made for 10 cells in a field and 5-6 images per condition. The intensity values were represented relative to the control condition in arbitrary units (A.U.).

### **Colony formation assay (clonogenic assay)**

SW1990 SP PD2/PAF1 CRISPR KD cells and control SW1990 SP cells were trypsinized and seeded at a density of 1000 cells/well in a 6-well plate in triplicates. The cells were cultured in CSC-specific media, with media changed once in two days. After two weeks of growth, the cells were fixed with 100% methanol and stained with crystal violet stain (0.1%, w/v in 20 mM 4-morpholinepropanesulfonic acid; Sigma) before the colonies started to merge. Total colony area was quantified using ImageJ.

### **Tumor sphere assay**

Capan1 SP cells that were engineered to knockdown PAF1 using Dox-induced shRNA were seeded in triplicates in a 96-well non-adherent plate (Corning Inc., Corning, New York, USA) in CSC-specific media at a concentration of 100 cells/well in two sets. The cells in suspension culture were observed under the microscope and fresh media was added every alternate day without removing the existing media in the set designated as control, whereas the set designated as KD set received Dox at 2 µg/ml every alternate day. Treatment with RK-33 was initiated 24 h after cell seeding. A week later, multiple images were taken per well for different fields of view. The diameter of each tumor sphere was measured using Motic Images Plus 2.0 ML software; the plot depicting the diameter of tumor sphere in PAF1 KD cells and control cells was plotted using MedCalc software.

#### **Cell motility assay**

The motility assay was performed by using a chamber containing a monolayer-coated polyethylene terephthalate membrane (six-well insert, a pore size of 8 µm; Becton Dickinson, Franklin Lakes, NJ, USA). Both control and PAF1 knockdown (Dox treated) SW1990 cells ( $1 \times 10^6$  cells per well) were seeded in six-well plates. After a 24 h incubation period, the migrated cells that had reached the lower chamber were stained with a Diff-Quick stain set and counted in different fields. The average number of migrated cells per representative field was calculated.

#### **Wound-healing assay**

The wound-healing assay was performed as described previously<sup>9</sup>. Briefly,  $4 \times 10^6$  control and PAF1 KD (2 mg/ml doxycycline treated) cells were seeded in 6-well plates. After 24 h, a scratch was made on the bottom of each well using a P200 pipette tip. Photographs of the scratch were taken at 0 h and 24 h. The pictures were then analyzed to quantify the change in size of the scratches as the cells migrated into the space; wound closure was compared between control and PAF1 depleted cells.

#### **Immunoprecipitation analysis**

SW1990 SP, HPDE, and F9 cells were cultured in their respective culture conditions, and the lysates were collected in a CHAPS non-denaturing immunoprecipitation buffer (20 mM Tris, pH 7.5, 200 mM NaCl, 1%). Immunoprecipitation was performed with PAF1 (ChIP-grade, Abcam) and anti-Phf5a (Proteintech) antibodies using Dynabeads protein G (Invitrogen). Following pre-clearing, 500 µg of lysates prepared at 1 mg/ml were incubated with 3 µg of respective antibodies overnight in a rotor at 4 °C. The next day, dyna beads (20 µl per reaction) were added to the antibody-lysate mix and incubated for rotation at 4 °C for 6 h. Thereafter, the unbound antibodies were washed with IP wash buffer (40 mM HEPES pH 7.4, 500 mM NaCl, 2.5 mM MgCl<sub>2</sub>, 2 mM EGTA, and 1% Triton X-100), and the immunoprecipitated proteins were eluted using a high pH ammonium buffer and were concentrated using a speed Vac. The immunoprecipitates, or total cell lysates, were transferred onto the PVDF membrane after being resolved on 10% SDS PAGE, and thereafter were incubated overnight at 4 °C with primary antibodies (anti-PAF1, anti-OCT3/4, anti-LEO1, anti-CTR9, and anti-CDC73).

#### **RNA isolation and quantitative reverse-transcription Polymerase Chain Reaction (qRT-PCR)**

Total cellular RNA was extracted from cells using the RNeasy kit (Qiagen, Hilden, Germany) and processed for reverse transcription to generate cDNA as described previously<sup>10</sup>. cDNA products were assayed by quantitative real-time PCR using SYBR Green incorporation. The expression of all genes was normalized to that of internal control β-actin and expressed relative to the indicated reference sample (average ± SEM of triplicate reactions).

#### **Human transcription factors PCR array**

Total RNA isolated from SW1990 SP and PAF1-depleted SP cells were reverse-transcribed using RT<sup>2</sup> SYBR qPCR master mix (330,401, Qiagen). Aliquots of 25 µl of the mix of both samples were added in separate 96-well PCR array kits containing lyophilized gene-specific

primer set (PAHS-075Z, Qiagen). Threshold cycles were used to calculate fold change using the online web server of RT<sup>2</sup> profiler PCR array data analysis<sup>11</sup>.

### **Chromatin Immunoprecipitation (ChIP)-Sequencing**

SW1990 SP cells were fixed with 0.4% formaldehyde and 1.5 mM EGS (ethylene glycol bis(succinimidyl succinate)) (Thermo Scientific Fischer), washed, harvested, and resuspended in 500 µl SDS lysis buffer (1% SDS, 10 mM EDTA, 50 mM Tris-HCl [pH 8.1], 1 mM PMSF, and 1 µg/ml aprotinin). Samples were sonicated and diluted in ChIP dilution buffer (0.01% SDS, 1.1% Triton X-100, 1.2 mM EDTA, 16.7 mM Tris-HCl [pH 8.1], 167 mM NaCl, 1 mM PMSF, and 1 µg/ml aprotinin). For input control, 10% of sonicated samples were separated. Immunoprecipitation was performed with ChIP-grade PAF1 (Abcam) and Phf5a (Proteintech) antibody as previously described. Chromatin extracts were pulled down with protein A+G beads. The samples were washed extensively with wash buffers (low salt, high salt, LiCl, and Tris/EDTA buffers), eluted with SDS elution buffer, and subjected to reverse cross-linking and proteinase digestion. IgG antibody was used as a control for the ChIP assay.

ChIP-seq Analysis: The captured and purified DNA was prepared for high throughput sequencing using the New England Biolabs NEBNext Ultra II DNA Library Prep Kit for Illumina. The resulting indexed libraries were sequenced by the UNMC Sequencing Core Facility using an Illumina NextSeq 500 Genome Analyzer. Initial raw sequence files were processed based on the following steps. Adaptor sequences and low quality (Phred score < 20) ends were trimmed from sequences using Trim Galore software package ([http://www.bioinformatics.babraham.ac.uk/projects/trim\\_galore/](http://www.bioinformatics.babraham.ac.uk/projects/trim_galore/)). Resulting fastq files were aligned to the human genome (GRCh38/hg38) using the sequence aligner Bowtie2 (version 2.2.3)<sup>12</sup>. The software package Picard routine, MarkDuplicates, (<http://broadinstitute.github.io/picard/>) was used to remove sequence duplications. For peak calling of ChIP enriched regions, the MACS2 peak caller software (version 2.1.1)<sup>13</sup> of each ChIP

to corresponding input DNA sample was used to determine binding regions based on a FDR adjusted p-value (q-value) <0.05. BigWig files were generated using the deeptools bamCoverage routine (<https://deeptools.readthedocs.io/en/develop/>). Alignment of significant peaks to gene-specific regions was accomplished using the bedtools routine intersect (<https://bedtools.readthedocs.io/en/latest/>). Raw files were submitted to GEO (accession number GSE144371).

### **RNA-Sequencing**

SW1990 SP control and PAF1 CRISPR KD cells were lysed in RNA lysis buffer supplied with the mirVana RNA isolation kit (Thermo Scientific Fischer, n = 2). Total RNA was isolated in accordance with the manufacturer's protocol. Whole transcriptome analysis (RNA sequencing) was performed on PAF1 KD and control cells at the Sequencing Core Facility at the University of Nebraska Medical Center. RNA quality was checked with an Agilent Bioanalyzer (Agilent Technologies, Inc.) and all RINs (RNA integrity numbers) were 10. Library preparation was achieved using Illumina TruSeq RNA Sample Preparation Kit according to the manufacturer's protocol. Fifteen cycles of PCR amplification were performed for each library, followed by examination of size distribution using an Agilent Bioanalyzer (Agilent Technologies, Inc.) and a DNA 1000 chip. Each sample used one out of twelve unique indices (Illumina). All libraries displayed a band between 200–500 bp with a peak at approximately 290 bp. The Qubit 2.0 Fluorometer (Life Technologies, Inc.) was used to quantitate the libraries. Loading was performed at a concentration of 6 pM. Sequencing was done on HiSeq 2500 sequencer in rapid mode. It was a single read, 50 cycle, sequencing run, and onboard clustering and V2 chemistry was used. Raw files for RNA-seq were submitted to GEO (accession number GSE144371).

### **Mass Spectrometry**

Sample prep summary: Protein fractions were excised from SDS-PAGE gel, destained, reduced with tris-carboxyethylphosphine, alkylated with iodoacetamide, and digested overnight with



sequencing-grade trypsin (Promega). Tryptic peptides were eluted from the gel and concentrated to 20  $\mu$ l by vacuum centrifugation and analyzed using a high-resolution mass spectrometry nano-LC-MS/MS Tribrid system, Orbitrap Fusion™ Lumos™ coupled with UltiMate 3000 HPLC system (Thermo Scientific). 500 ng of peptides were run by the pre-column (Acclaim PepMap™ 100, 75 $\mu$ m  $\times$  2cm, nanoViper, Thermo Scientific) and the analytical column (Acclaim PepMap™ RSCL, 75  $\mu$ m  $\times$  50 cm, nanoViper, Thermo Scientific). The samples were eluted using a 120-min linear gradient of ACN (5-45%) in 0.1% FA.

Results summary: All MS/MS samples were analyzed using Mascot (Matrix Sciences, London, UK, version 2.6.). Mascot was set up to search the SwissProt database (selected for Homo sapiens, 2018\_06, 20361 entries), assuming the digestion enzyme trypsin. Parameters on MASCOT were set as follows: Enzyme: trypsin, Max missed cleavage: 1, Peptide charge: 1+, 2+, and 3+, Peptide tolerance:  $\pm$  0.8 Da, Fixed modifications: carbamidomethyl (C), Variable modifications: oxidation (M), MS/MS tolerance:  $\pm$  0.6 Da with error tolerant search, Instrument: ESI-TRAP. MASCOT results for different gel cuts of the same sample were combined and analyzed using Scaffold, which allows multiple search results to be condensed into a single result file.

Scaffold (version 4.8.7, Proteome Software Inc., Portland, OR) was used to validate MS/MS-based peptide and protein identifications. Peptide identifications were accepted if they could be established at greater than 95.0% probability by the Peptide Prophet algorithm<sup>14</sup> with Scaffold delta-mass correction. Protein identifications were accepted if they could be established at greater than 99.0% probability and contained at least 2 identified peptides. Protein probabilities were assigned by the Protein Prophet algorithm<sup>15</sup>. Proteins that contained similar peptides and could not be differentiated based on MS/MS analysis alone were grouped to satisfy the principles of parsimony. Proteins sharing significant peptide evidence were grouped into clusters.

### **Statistical analysis**

Student's *t*-test was used to determine the statistical significance between control and PAF1 knockdown group in all the experiments pertaining to this study. Statistical analysis and the generation of graphs were performed using GraphPad Prism and MedCalc software. Alfa level of 0.05 was used for statistical significance unless otherwise indicated. Error bars were given on the basis of calculated standard error values.

### Supplementary references

1. Tang Z, Li C, Kang B, et al. GEPIA: a web server for cancer and normal gene expression profiling and interactive analyses. *Nucleic Acids Res* 2017;45:W98-W102.
2. Cancer Genome Atlas Research Network. Electronic address aadhe, Cancer Genome Atlas Research N. Integrated Genomic Characterization of Pancreatic Ductal Adenocarcinoma. *Cancer Cell* 2017;32:185-203 e13.
3. Vaz AP, Deb S, Rachagani S, et al. Overexpression of PD2 leads to increased tumorigenicity and metastasis in pancreatic ductal adenocarcinoma. *Oncotarget* 2015.
4. Gürlevik E, Fleischmann-Mundt B, Brooks J, et al. Administration of Gemcitabine After Pancreatic Tumor Resection in Mice Induces an Antitumor Immune Response Mediated by Natural Killer Cells. *Gastroenterology* 2016;151:338-350.e7.
5. Boj SF, Hwang CI, Baker LA, et al. Organoid models of human and mouse ductal pancreatic cancer. *Cell* 2015;160:324-38.
6. Lakshmanan I, Batra SK. Protocol for Apoptosis Assay by Flow Cytometry Using Annexin V Staining Method. *Bio Protoc* 2013;3.
7. Vaz AP, Ponnusamy MP, Rachagani S, et al. Novel role of pancreatic differentiation 2 in facilitating self-renewal and drug resistance of pancreatic cancer stem cells. *Br. J Cancer* 2014;111:486-496.
8. Nimmakayala RK, Seshacharyulu P, Lakshmanan I, et al. Cigarette Smoke Induces Stem Cell Features of Pancreatic Cancer Cells via PAF1. *Gastroenterology* 2018;155:892-908 e6.
9. Lakshmanan I, Rachagani S, Hauke R, et al. MUC5AC interactions with integrin beta4 enhances the migration of lung cancer cells through FAK signaling. *Oncogene* 2016;35:4112-21.
10. Ponnusamy MP, Deb S, Dey P, et al. RNA polymerase II associated factor 1/PD2 maintains self-renewal by its interaction with Oct3/4 in mouse embryonic stem cells. *Stem Cells* 2009;27:3001-3011.
11. Kumar S, Das S, Rachagani S, et al. NCOA3-mediated upregulation of mucin expression via transcriptional and post-translational changes during the development of pancreatic cancer. *Oncogene* 2015;34:4879-89.
12. Langmead B, Salzberg SL. Fast gapped-read alignment with Bowtie 2. *Nat Methods* 2012;9:357-9.
13. Zhang Y, Liu T, Meyer CA, et al. Model-based analysis of ChIP-Seq (MACS). *Genome Biol* 2008;9:R137.
14. Keller A, Nesvizhskii AI, Kolker E, et al. Empirical statistical model to estimate the accuracy of peptide identifications made by MS/MS and database search. *Anal Chem* 2002;74:5383-92.
15. Nesvizhskii AI, Keller A, Kolker E, et al. A statistical model for identifying proteins by tandem mass spectrometry. *Anal Chem* 2003;75:4646-58.

**Supplementary Table 1: Primer sequence for binding sites (B.S.) on Nanog promoter**

| Name  | Forward Primer Sequence   | Reverse Primer Sequence     | Amplicon Size (bp) |
|-------|---------------------------|-----------------------------|--------------------|
| B.S.1 | CATTTGGCATGTGTGTCAACTC    | TTCAAGTGATAGGATTTGGATAGGG   | 92                 |
| B.S.2 | GGATTTGGTCAGCTCCTTTACT    | GAACCAGAACGACTCCATCTTC      | 181                |
| B.S.3 | GTCTCAGCCTCCCTAGTAGAT     | CACCTGTAATCCCAGCACTT        | 174                |
| B.S.4 | TCAGCCTCGGTGAGTCTTGGTG    | CTCCCACACAAGCTGACTTT        | 310                |
| B.S.5 | CATAATCGGGATTTGCTAAGAGTTT | TGTGGGTGTGTGTGTTTCT         | 211                |
| B.S.6 | TGCCTTGGCTTCATGCTATAA     | CTGAGGTTATTGAAATTCTCATTAGGG | 168                |
| B.S.7 | GCCTCCAATTTACTGGGATTA     | CGAGCAACAGAACCTGAAGA        | 178                |
| B.S.8 | TGAGACTGGTAGACGGGATTA     | GAAATAGGACCTCCAGAAGGAAA     | 222                |

**Supplementary Table 2: Primers used in q-RT-PCR**

| Gene Name        | (Forward and Reverse primers) | Amplicon Size (bp) |
|------------------|-------------------------------|--------------------|
| PAF1/PD2         | F: CTCACAGCATTACAGCAAACC      | 231                |
|                  | R: GTCTCTTCTACAGGCAGGAAAT     |                    |
| Sox9             | F: GAGCCGGATCTGAAGAGGGA       | 151                |
|                  | R: GCTTGACGTGTGGCTTGTTT       |                    |
| CD44v6           | F: CCAGGCAACTCCTAGTAGTACAACG  | 112                |
|                  | R: CGAATGGGAGTCTTCTTTGGGT     |                    |
| $\beta$ -Catenin | F: AAAATGGCAGTGC GTTTAG       | 100                |
|                  | R: TTTGAAGGCAGTCTGTGCGTA      |                    |
| ALDH1A3          | F: ATCAACTGCTACAACGCCCT       | 98                 |
|                  | R: TATTCGGCCAAAGCGTATTC       |                    |
| CTR9             | F: AAATTCTCGGCTCTCTCTATGC     | 92                 |
|                  | R: GGGATACTGTTCTGTGACCTTC     |                    |
| LEO1             | F: AGTGTAGAGCCCAGACCTT        | 143                |
|                  | R: CCTTCTTCATCTCGGCGTATC      |                    |
| CDC73            | F: GCCTTCCATCTGAAGTATGATGA    | 142                |
|                  | R: TGTACCTGTCCAATGTTTCCC      |                    |
| $\beta$ -actin   | F: GGACATCCGCAAAGACCTGTA      | 143                |
|                  | R: GCTCAGGAGGAGCAATGATCT      |                    |
| Nanog            | F: CCTGTGATTTGTGGGCCTG        | 78                 |
|                  | R: GACAGTCTCCGTGTGAGGCAT      |                    |

### List of antibodies

| ANTIBODIES                                               | SOURCE                    | IDENTIFIER AND DILUTION             |
|----------------------------------------------------------|---------------------------|-------------------------------------|
| <b>List of primary antibodies used in Western blot</b>   |                           |                                     |
| <b>Non phospho <math>\beta</math>-CATENIN</b>            | Cell Signaling Technology | Cat# CST-19807P (Rb) (1:1000)       |
| <b>ALDH1</b>                                             | Santa Cruz Biotechnology  | Cat# sc-374149 (Ms) (1:1000)        |
| <b>CD44</b>                                              | Cell Signaling Technology | Cat# CST-5640S (Ms) (1:1000)        |
| <b>OCT3/4</b>                                            | Santa Cruz Biotechnology  | Cat# sc-5279 (Ms) (1:500)           |
| <b>PAF1/PD2</b>                                          | Bethyl Laboratories       | Cat# Bethyl-A300-173A (Rb) (1:5000) |
| <b>CD44v6</b>                                            | Thermo Fisher Scientific  | Cat# BMS125 (Ms) (1:1000)           |
| <b>CD24</b>                                              | Santa Cruz Biotechnology  | Cat# sc-19585 (Ms) (1:1000)         |
| <b>ESA (EpCAM)</b>                                       | Cell Signaling Technology | Cat# CST 2626 (Rb) (1:1000)         |
| <b>CD133</b>                                             | Cell Signaling Technology | Cat# CST-5860 (Rb) (1:1000)         |
| <b>DDX3</b>                                              | Abcam                     | Cat# ab235940 (Rb) (1:1000)         |
| <b>LEO1</b>                                              | Bethyl Laboratories       | Cat# A300-174A (Rb) (1:1000)        |
| <b>CTR9</b>                                              | Bethyl Laboratories       | Cat# A301-395A-1 (Rb) (1:1000)      |
| <b>CDC73</b>                                             | Bethyl Laboratories       | Cat# A300-170A (Rb) (1:1000)        |
| <b><math>\beta</math>-Actin</b>                          | Santa Cruz Biotechnology  | Cat# sc-47778 (Ms) (1:2000)         |
| <b>PHF5A</b>                                             | Proteintech               | Cat# 15554-1-AP (Rb) (1:500)        |
| <b>SOX2</b>                                              | Santa Cruz Biotechnology  | Cat# sc-20088 (Rb) (1:500)          |
| <b>SOX9</b>                                              | Abcam                     | Cat# ab26414 (Rb) (1:1000)          |
| <b>NANOG</b>                                             | Thermo Fisher Scientific  | Cat# PA1-097 (Rb) (1:1000)          |
| <b>List of secondary antibodies used in Western blot</b> |                           |                                     |
| <b>Goat anti-Rb IgG HRP</b>                              | Invitrogen                | Cat# 31460 (1:3000 to 1:5000)       |
| <b>Goat anti-Ms IgG HRP</b>                              | Invitrogen                | Cat# 31430 (1:3000 to 1:5000)       |

| ANTIBODIES                                                                            | SOURCE                       | IDENTIFIER/DILUTION                                      |
|---------------------------------------------------------------------------------------|------------------------------|----------------------------------------------------------|
| <b>List of primary antibodies used in Immunofluorescence and Immunohistochemistry</b> |                              |                                                          |
| <b>SOX9</b>                                                                           | Abcam                        | Cat# ab182579 (Rb) (1:300)                               |
| <b>DDX3</b>                                                                           | Abcam                        | Cat# ab235940 (Rb) (1:300)                               |
| <b>CD44v6</b>                                                                         | Thermo Fisher Scientific     | Cat# BMS125 (Ms) (1:300)                                 |
| <b>PAF1/PD2 rabbit Ab</b>                                                             | Abcam                        | Cat# ab20662 (Rb)(1:250)                                 |
| <b>PAF1/PD2 mouse mAb</b>                                                             | Our lab                      | N/A (Ms) (1:100)                                         |
| <b>Nanog</b>                                                                          | Santa Cruz<br>Biotechnology  | Cat# sc-293121 (Ms) (1:150)                              |
| <b>PHF5A</b>                                                                          | Proteintech                  | Cat# 15554-1-AP (Rb)(1:200)                              |
| <b>Non phospho <math>\beta</math>-CATENIN</b>                                         | Cell Signaling<br>Technology | Cat# CST-19807P (Rb)<br>(1:300)                          |
| <b>ALDH1/2</b>                                                                        | Santa Cruz                   | Cat# sc-374149 (Ms) (1:300)                              |
| <b>Ki67</b>                                                                           | Cell Signaling<br>Technology | Cat # 9449 (Ms) (1:300)                                  |
| <b>List of secondary antibodies used in Immunofluorescence</b>                        |                              |                                                          |
| <b>Alexa Fluor 568 goat anti-mouse IgG</b>                                            | Life Technologies            | Cat# A11004 (1:300)                                      |
| <b>Alexa Fluor 568 goat anti-rabbit IgG</b>                                           | Life Technologies            | Cat# A11011 (1:300)                                      |
| <b>Alexa Fluor 488 goat anti-mouse IgG</b>                                            | Life Technologies            | Cat# A11001 (1:300)                                      |
| <b>Alexa Fluor 488 goat anti-rabbit IgG</b>                                           | Life Technologies            | Cat# A11008 (1:300)                                      |
| <b>List of antibodies used in Immunoprecipitation assay and ChIP assay</b>            |                              |                                                          |
| <b>PAF1/PD2</b>                                                                       | Abcam                        | Cat# ab20662 (Rb)<br>(3 $\mu$ g/900 $\mu$ g protein)     |
| <b>PHF5A</b>                                                                          | Proteintech Group            | Cat# 15554-1-AP (Rb)                                     |
| <b>ChromPure IgG</b>                                                                  | Jackson<br>ImmunoResearch    | Cat# 011-000-003 (Rb)<br>(3 $\mu$ g/900 $\mu$ g protein) |

|                                                |                  |                                           |
|------------------------------------------------|------------------|-------------------------------------------|
|                                                | Laboratories     |                                           |
| <b>DDX3</b>                                    | Abcam            | Cat# ab235940 (Rb)<br>(3µg/900µg protein) |
| <b>List of antibody used in Flow cytometry</b> |                  |                                           |
| <b>CD44 APC Human</b>                          | Miltenyi Biotech | Cat# 130-098-110                          |
